# Supplementary material for: Unlocking Lewis acidity via the redox non-innocence of a phenothiazine-substituted borane
Source: Royal Society of Chemistry journal article supplement (doi:10.1039/d4cc01059k), 2024-01-01
Supplement: d4cc01059k1.pdf [file d4cc01059k1.pdf]

**Electronic Supplementary Information**  
for  
**Unlocking Lewis Acidity *via* the Redox Non-Innocence of a Phenothiazine-Substituted Borane**

Taylor P. L. Cosby, Avik Bhattacharjee, Samantha K. Henneberry, Jesse LeBlanc, Christopher B. Caputo

*Department of Chemistry*  
*York University*  
4700 Keele Street, Toronto, ON CA  
[caputo@yorku.ca](mailto:caputo@yorku.ca)

**Table of Contents**

|                                                                                                              |            |
|--------------------------------------------------------------------------------------------------------------|------------|
| <b>S1. General Considerations.....</b>                                                                       | <b>S2</b>  |
| <b>S2. Synthetic Procedures and Characterization.....</b>                                                    | <b>S4</b>  |
| <b>S2.1. Synthesis and Characterization of 1, 2, and 3.....</b>                                              | <b>S4</b>  |
| <b>S2.2. Single-electron Oxidation of 1, 2, and 3.....</b>                                                   | <b>S7</b>  |
| <b>S3. Cyclic Voltammetry.....</b>                                                                           | <b>S8</b>  |
| <b>S4. Electron Paramagnetic Resonance Spectroscopy.....</b>                                                 | <b>S10</b> |
| <b>S5. Lewis Acidity Assessment.....</b>                                                                     | <b>S12</b> |
| <b>S5.1. Gutmann-Beckett Analysis of 3, 3<sup>+</sup> and B(C<sub>6</sub>F<sub>5</sub>)<sub>3</sub>.....</b> | <b>S12</b> |
| <b>S5.2. Computational Lewis Acidity Assessment.....</b>                                                     | <b>S14</b> |
| <b>S6. Stoichiometric Experiments.....</b>                                                                   | <b>S15</b> |
| <b>S7. Catalytic Experiments.....</b>                                                                        | <b>S22</b> |
| <b>S8. Computational Details.....</b>                                                                        | <b>S24</b> |
| <b>S8.1. Optimized Coordinates for Lewis Acidity Assessment.....</b>                                         | <b>S24</b> |
| <b>S8.2. Optimized Coordinates for Mechanistic Investigation.....</b>                                        | <b>S39</b> |
| <b>S9. Single Crystal X-Ray Diffraction .....</b>                                                            | <b>S44</b> |
| <b>S10. References.....</b>                                                                                  | <b>S51</b> |

## S1. General Considerations

All reactions were carried out under an atmosphere of anhydrous N<sub>2</sub> using standard glovebox (MBraun LABstar) and/or Schlenk techniques unless otherwise stated. All glassware, needles, and stir bars were dried in an oven at 140 °C and/or flame dried under vacuum before use. All solvents were obtained from an MBraun MB-SPS 800 solvent purification system, collected under vacuum, and dried over 4Å molecular sieves prior to use. All commercially available reagents were used as received from Sigma Aldrich, TCI Chemicals, or Oakwood Chemicals and used without further purification. Bis(pentafluorophenyl)phenothiazylborane,<sup>1</sup> bismesitylphenothiazylborane,<sup>2</sup> (4-bromophenyl)dimesitylborane<sup>3</sup> and (10-phenylphenothiazinyl)-dimesitylborane<sup>4</sup> were synthesized following known literature procedures. Deuterated solvents were degassed by employing a freeze-pump-thaw procedure and dried over 4Å molecular sieves before use.

### S1.1 Nuclear Magnetic Resonance (NMR) Spectroscopy

Spectra were acquired on either DRX 600 MHz, Bruker Avance NEO 400 MHz, or Bruker Avance NEO 300 MHz NMR spectrometers at 25 °C and referenced to the corresponding residual solvent peak of deuterated solvent (chloroform-d or acetonitrile-d<sub>3</sub>). Chemical shifts for protons (<sup>1</sup>H) and carbons (<sup>13</sup>C) are reported relative to tetramethylsilane (SiMe<sub>4</sub>). Chemical shifts for fluorine (<sup>19</sup>F) and boron (<sup>11</sup>B) are reported relative to 15 % BF<sub>3</sub>-Et<sub>2</sub>O. The NEO systems were operated using Topspin version 4.0.8 and the DRX system was operated using Xwinnmr version 3.5 and analyzed using Mestrenova 14.3.1 software. Chemical shifts are reported in ppm, coupling constants reported in hertz (Hz), and conventional abbreviations for multiplicity were used (br = broad, s = singlet, d = doublet, t = triplet, dt = doublet of triplets, m = multiplet). All percent conversions in catalytic reactions were calculated using NMR integration.

### S1.2 Cyclic Voltammetry

Cyclic voltammetry measurements were performed using a AUTOLAB PGSTAT204 potentiostat equipped with a typical three-electrode cell with a Pt wire counter electrode, an Ag/AgCl reference electrode and glassy carbon working electrode. Measurements were performed at room temperature in dry, degassed dichloromethane containing 0.1 M tetrabutylammonium hexafluorophosphate (TBAPF<sub>6</sub>). The scan rate was 100 mV/s and the current was 100 μA.

### S1.3 Electron Paramagnetic Resonance (EPR) Spectroscopy

X-band continuous-wave EPR (cw-EPR) spectra were collected at room temperature using a Bruker X-band CW Magnettech ESR5000 spectrometer. EPR data was collected in solution with 3<sup>•+</sup> dissolved in 0.4 mL of either CH<sub>2</sub>Cl<sub>2</sub> or acetonitrile and 0.1 mL was dispensed into a 3 mm quartz EPR tube.

### S1.3 Mass Spectrometry

Mass spectrometry data was provided from the AIMS Mass Spectrometry Laboratory at the University of Toronto and was acquired using dual electrospray ionization in positive mode on an Agilent 6538 UHD instrument.

### S1.4 X-ray Crystallographic Methods

Crystals suitable for X-ray diffraction were grown from the slow evaporation of pentane into a CH<sub>2</sub>Cl<sub>2</sub>. Crystals were chosen under paratone oil and mounted to the diffractometer under a stream of N<sub>2</sub> and kept at 173.0 K or 150.0 K during data collection. Diffraction data was collected

on a Bruker APEX-II CCD diffractometer with a MoK $\alpha$  ( $\lambda = 0.71073$ ) radiation source. Using Olex2,<sup>5</sup> the structure was solved with the XS structure solution program using Direct Methods and refined with the SHELXL refinement package<sup>6</sup> using Least Squares minimization. Images were generated using ORTEP.

## S2 Synthetic Procedures and Characterization

### S2.1 Synthesis and Characterization of 1, 2, and 3

#### 10-(bis(pentafluorophenyl)boraneyl)phenothiazine (**1**):<sup>1</sup>

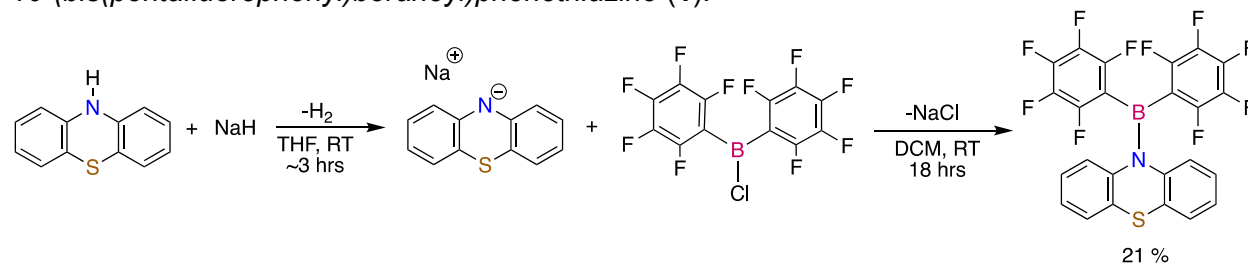

Phenothiazine (0.115 g, 0.578 mmol, 1 eq.) was dissolved in approximately 3 mL of tetrahydrofuran (THF). Sodium hydride (0.016 g, 0.636 mmol, 1.1 eq.) was suspended in THF and added dropwise to the phenothiazine solution. The resulting mixture was allowed to stir until the evolution of gas stops. The solvent was removed in vacuo to yield a yellow sodium amide precipitate, which was resuspended in CH<sub>2</sub>Cl<sub>2</sub>. A solution of chlorobis(pentafluorophenyl)borane (0.2199 g, 0.578 mmol, 1 eq.) was prepared in approximately 2 mL of CH<sub>2</sub>Cl<sub>2</sub>. The yellow sodium amide salt suspension was added dropwise to the chlorobis(pentafluorophenyl)borane solution and left stirring overnight at room temperature. The solvent was removed in vacuo to yield a brown oil. The aminoborane product was solidified by washing three times with pentanes and drying in vacuo to yield a beige solid (0.150 g, 48 %). NMR resonances are consistent with previous literature reports.

**<sup>1</sup>H NMR** (400 MHz, CDCl<sub>3</sub>) δ: 7.47 (dd, 2H, *J* = 8.1, 1.5 Hz), 7.17 (td, 4H, *J* = 7.7, 1.3 Hz, 4H), 7.09 (m, 2H).

**<sup>19</sup>F {<sup>1</sup>H} NMR** (376 MHz, CDCl<sub>3</sub>) δ: 130.17 (m, 4F), -151.83 (t, 2F, *J* = 20.1 Hz), -160.97 (m, 4F).

**<sup>11</sup>B {<sup>1</sup>H} NMR** (128 MHz, CDCl<sub>3</sub>) δ: 38.6 (br).

**<sup>13</sup>C {<sup>1</sup>H} NMR** (101 MHz, CDCl<sub>3</sub>) δ: 145.9 (d, *J* = 243.8 Hz), 142.0, 141.9 (d, *J* = 256.9 Hz), 137.3 (d, *J* = 252.3 Hz), 132.5, 128.1, 127.2, 127.1, 124.1, 111.0.

10-(dimesitylboraneyl)phenothiazine (**2**):<sup>2</sup>

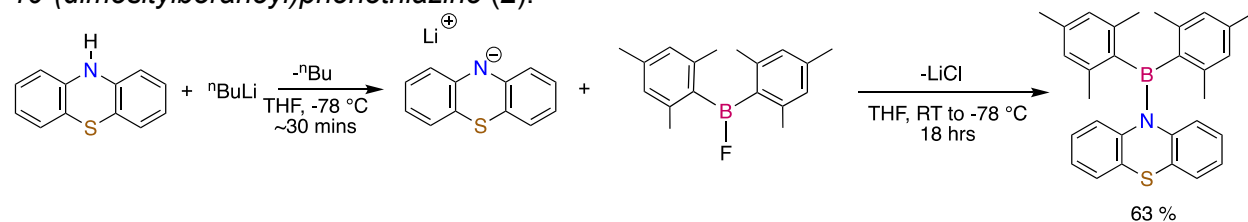

Phenothiazine (0.794 g, 4 mmol) was dissolved in 40 mL of anhydrous tetrahydrofuran (THF) and cooled to  $-78\text{ }^\circ\text{C}$ .  $n$ -Butyllithium ( $n\text{-BuLi}$ ) (2.625 mL, 1.6 M in hexanes, 4.2 mmol) was added dropwise, and the resulting yellow solution was stirred for 30 minutes. Separately, dimesitylfluoroborane (1.126 g, 4.2 mmol) was dissolved in 8 mL of THF. This solution was added dropwise to the yellow solution at  $-78\text{ }^\circ\text{C}$ . The mixture was allowed to stir and warm to room temperature overnight. The solvent was removed in vacuo, resulting in an off-white solid which was extracted with dichloromethane ( $\text{CH}_2\text{Cl}_2$ ) and washed with brine. The solution was dried with  $\text{MgSO}_4$  and filtered before the solvent was removed in vacuo, yielding a pale blue solid. The product was purified using flash column chromatography with hexanes as an eluent. The solvent was removed under reduced pressure and in vacuo to give the white product (1.125 g, 63 % yield). NMR resonances are consistent with previous literature reports.

**$^1\text{H}$  NMR** (400 MHz,  $\text{CDCl}_3$ )  $\delta$ : 7.27-7.24 (m, 2H) 7.17-7.14 (m, 2H), 7.01-6.97 (m, 2H), 6.89-6.87 (m, 2H), 6.66 (s, 4H), 2.37 (s, 12H), 2.18 (s, 6H).

**$^{11}\text{B}$  { $^1\text{H}}$  NMR** (128 MHz,  $\text{CDCl}_3$ )  $\delta$ : 51.0.

**$^{13}\text{C}$  { $^1\text{H}}$  NMR** (101 MHz,  $\text{CDCl}_3$ )  $\delta$ : 143.6, 140.7, 137.2, 129.9, 128.1, 127.2, 126.5, 125.5, 125.3, 24.1, 21.1.

10-(4-(dimesitylboraneyl)phenyl)phenothiazine (**3**):<sup>3,4</sup>

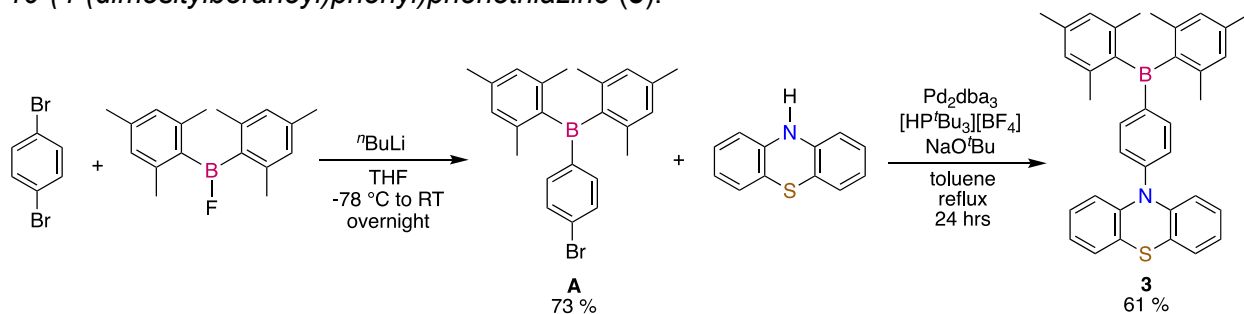

A solution of *para*-dibromobenzene (0.440 g, 1.864 mmol, 2 eq.) was prepared in anhydrous THF (10 mL) and cooled to  $-78\text{ }^{\circ}\text{C}$  in a dry ice/acetone bath. To the cooled solution, 2.5 M  $n\text{-BuLi}$  in hexanes (0.78 mL, 1.864 mmol, 2 eq.) was added dropwise over 20 minutes and the solution was stirred at  $-78\text{ }^{\circ}\text{C}$  for 1 hour. Dimesitylfluoroborane (0.250 g, 0.932 mmol, 1 eq.) was dissolved in anhydrous THF and transferred to an addition funnel before being added dropwise to the previous solution at  $-78\text{ }^{\circ}\text{C}$ . The solution was stirred at  $-78\text{ }^{\circ}\text{C}$  for 1 hour before being allowed to warm to room temperature while stirring overnight. Distilled water (5 mL) was added to quench the reaction and the mixture was extracted with  $\text{CH}_2\text{Cl}_2$ , washed with distilled water, and dried over sodium sulfate. The crude material was filtered before purification by column chromatography using hexanes as eluent. The product **A** was isolated as a white solid (0.1021 g, 73 % yield).

Under an inert atmosphere, a 50 mL Schlenk flask was charged with a 15 mL anhydrous toluene solution of **A** (0.276 g, 0.680 mmol, 1 eq.), phenothiazine (0.136 g, 0.680 mmol, 1 eq.),  $\text{Pd}_2\text{dba}_3$  (0.028 g, 0.020 mmol, 0.03 eq.), tri-*tert*-butylphosphonium tetrafluoroborate (0.010 g, 0.034 mmol, 0.05 eq.), and sodium *tert*-butoxide (0.131 g, 1.360 mmol, 2 eq.). The flask was equipped with a reflux condenser and heated to reflux under nitrogen for 24 hours. The reaction was quenched with 10 mL of distilled water and extracted with dichloromethane. The organic layer was dried over sodium sulfate and purified by column chromatography using hexanes/ $\text{CH}_2\text{Cl}_2$  (5:1 v/v). The product was isolated as a bright yellow solid (0.217 g, 61 % yield). NMR resonances are consistent with previous literature reports.

**$^1\text{H}$  NMR** (400 MHz,  $\text{CDCl}_3$ )  $\delta$ : 7.56 (d, 2H,  $J = 8.4$  Hz), 7.22 (d, 2H,  $J = 8.4$  Hz), 7.18 (dd, 2H,  $J = 7.4, 1.8$  Hz), 7.07-6.90 (m, 4H), 6.82 (s, 4H), 6.68 (dd, 2H,  $J = 8.0, 1.4$  Hz), 2.30 (s, 6H), 2.05 (s, 9H)

**$^{11}\text{B}$   $\{^1\text{H}\}$  NMR** (128 MHz,  $\text{CDCl}_3$ )  $\delta$ : 74.5.

**$^{13}\text{C}$   $\{^1\text{H}\}$  NMR** (101 MHz,  $\text{CDCl}_3$ )  $\delta$ : 146.0, 143.1, 142.9, 141.8, 140.9, 138.9, 138.8, 128.4, 127.7, 127.1, 125.8, 124.2, 124.0, 120.4, 23.7, 21.4.

## S2.2 Single-electron Oxidation of 1, 2, and 3

**General procedure for single-electron oxidation:** A suspension of oxidant (1.0 eq.) in 0.5 mL of dichloromethane ( $\text{CH}_2\text{Cl}_2$ ) was added dropwise using a Pasteur pipette to a solution of **1**, **2**, or **3** (1.0 eq.) in 1 mL of  $\text{CH}_2\text{Cl}_2$  while stirring at room temperature or  $-78\text{ }^\circ\text{C}$ . An additional 0.5 mL of  $\text{CH}_2\text{Cl}_2$  was used to transfer any residual oxidant into the reaction mixture. The resulting solutions were stirred for 1 hour before filtered through glass wool and solvent was removed *in vacuo*.

### 10-(4-(dimesitylboraneyl)phenyl)phenothiazinyl hexafluoroantimonate (**3<sup>+</sup>**)

Synthesized following general procedure with **3** (50.0 mg, 0.95 mmol) and  $\text{NOSbF}_6$  (25.4 mg, 0.95 mmol) at  $-78\text{ }^\circ\text{C}$ , yielding a deep, red-coloured solid (0.072 g, 99 % yield). Crystals suitable for X-ray diffraction were obtained by vapour diffusion with pentanes and  $\text{CH}_2\text{Cl}_2$  at  $-20\text{ }^\circ\text{C}$ .  $^{11}\text{B}$ ,  $^{13}\text{C}$ , and  $^{19}\text{F}$  NMR spectra were not obtained due to the paramagnetic nature of **3<sup>+</sup>**.

**$^1\text{H}$  NMR** (400 MHz,  $\text{CDCl}_3$ )  $\delta$ : 6.96 (br, 4H), 2.43 (br, 6H), 2.28 (br, 12H). **ESI-MS**  $\text{C}_{36}\text{H}_{34}\text{BNS}$  ( $m/z$ ):  $[\text{M}+\text{H}]^+$  calculated: 522.2536; found: 522.2528.

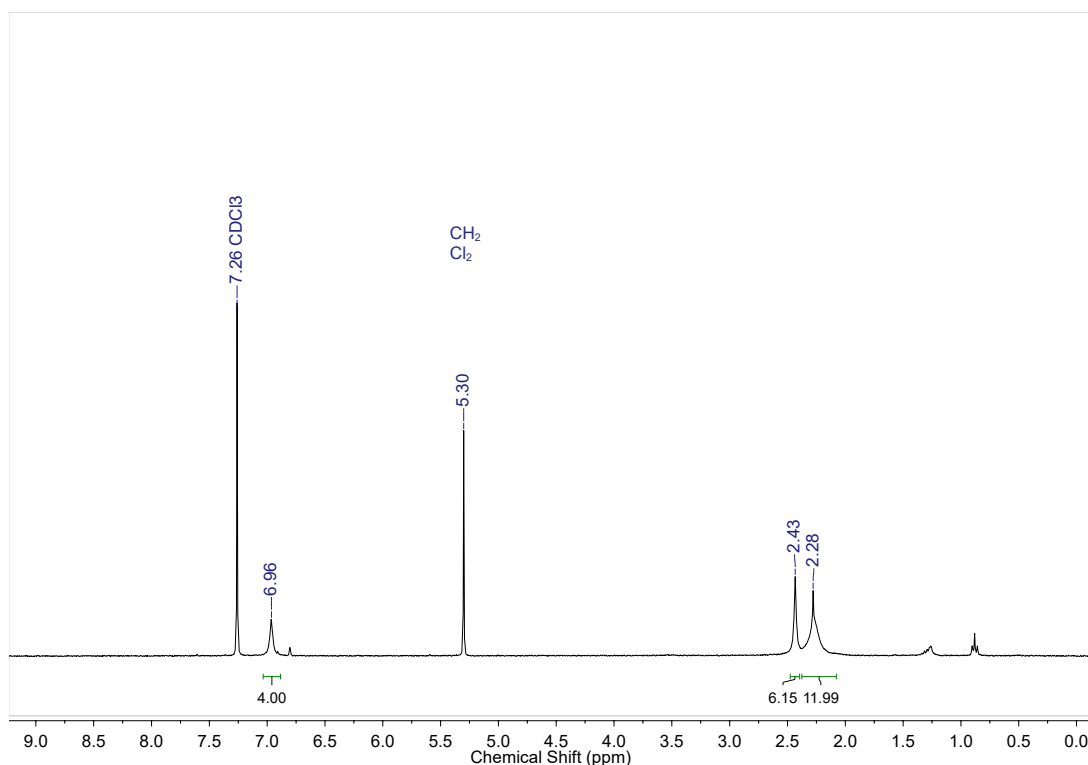

Figure S1:  $^1\text{H}$  NMR spectrum of **3<sup>+</sup>** in  $\text{CDCl}_3$ .

### S3 Cyclic Voltammetry of 1, 2, and 3

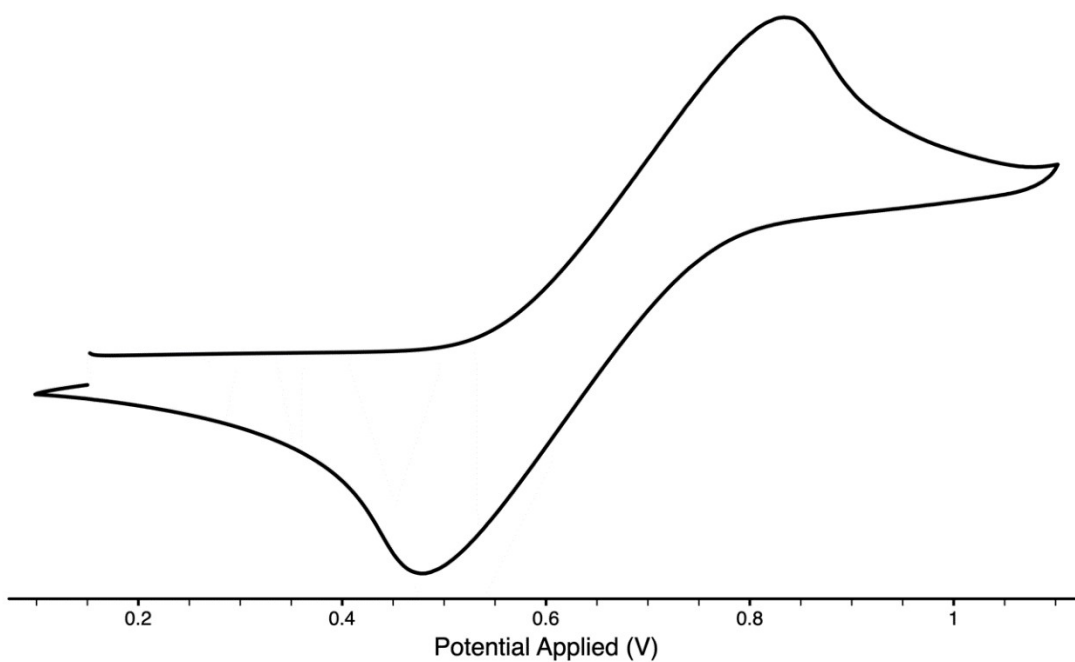

**Figure S2:** Cyclic voltammogram of **1** in  $\text{CH}_2\text{Cl}_2$  (0.1 M  $\text{TBAPF}_6$ , 100 mV/s) zoomed in on reversible redox event.

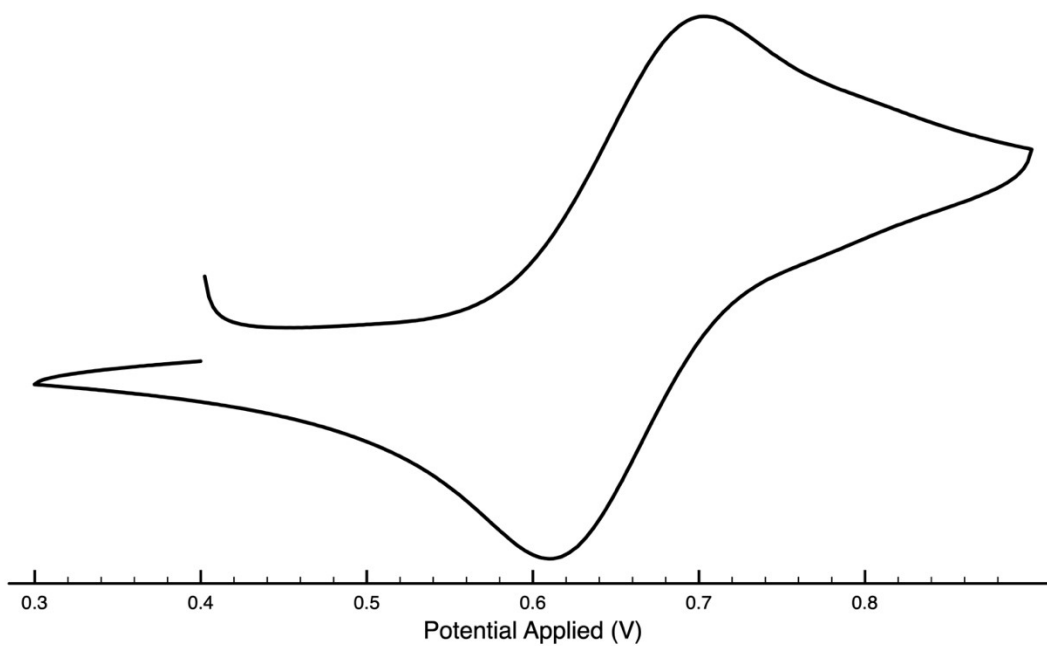

**Figure S3:** Cyclic voltammogram of **2** in  $\text{CH}_2\text{Cl}_2$  (0.1 M  $\text{TBAPF}_6$ , 100 mV/s) zoomed in on reversible redox event.



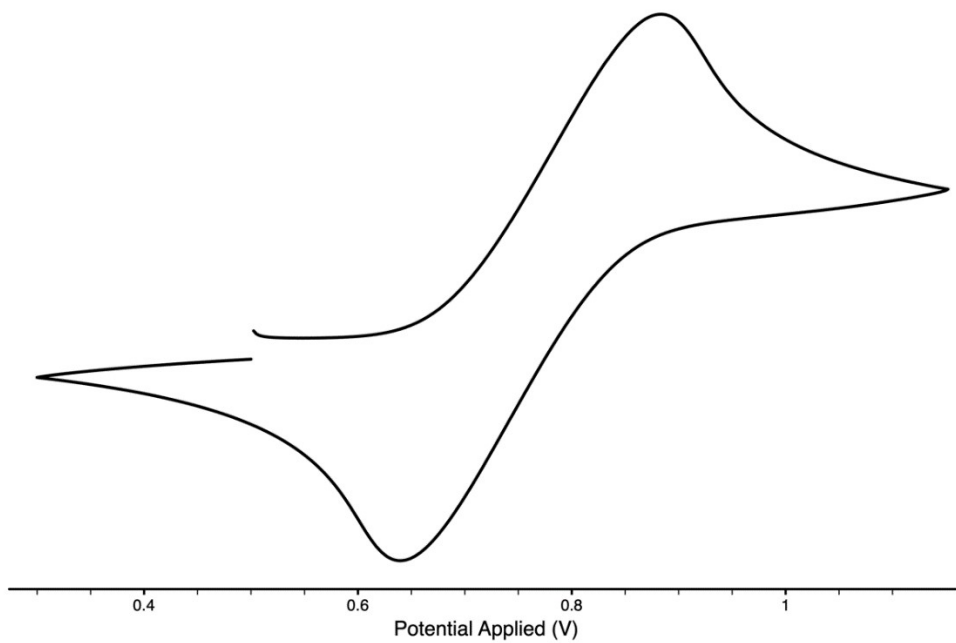

**Figure S4:** Cyclic voltammogram of **3** in  $\text{CH}_2\text{Cl}_2$  (0.1 M  $\text{TBAPF}_6$ , 100 mV/s) zoomed in on reversible redox event.

## S4 Electron Paramagnetic Resonance (EPR) Spectroscopy of 1<sup>•+</sup>, 2<sup>•+</sup>, and 3<sup>•+</sup>

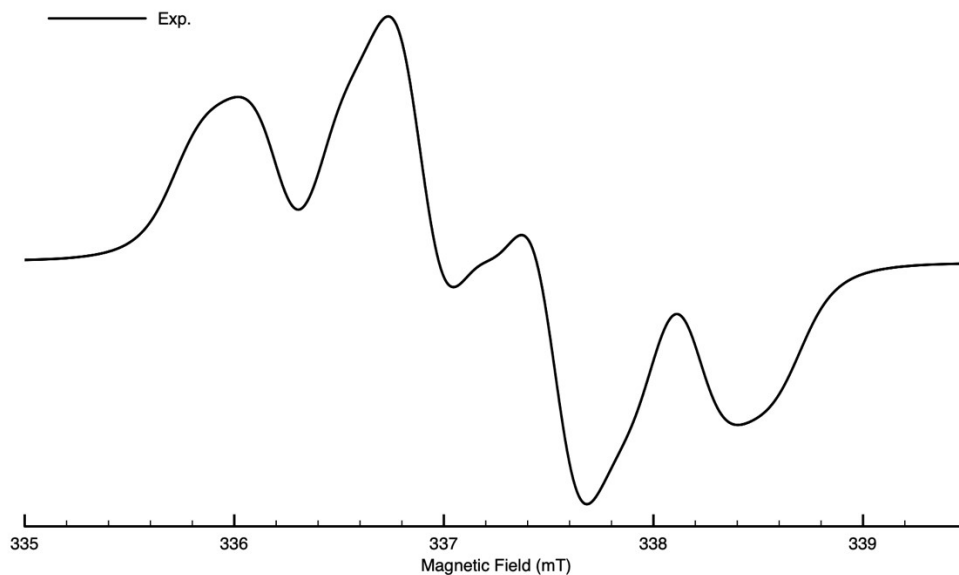

**Figure S5:** Experimental EPR spectrum of 1<sup>•+</sup> in CH<sub>2</sub>Cl<sub>2</sub> at 298 K; frequency = 9.468 GHz, power = 10 mW, modulation = 1 mT.

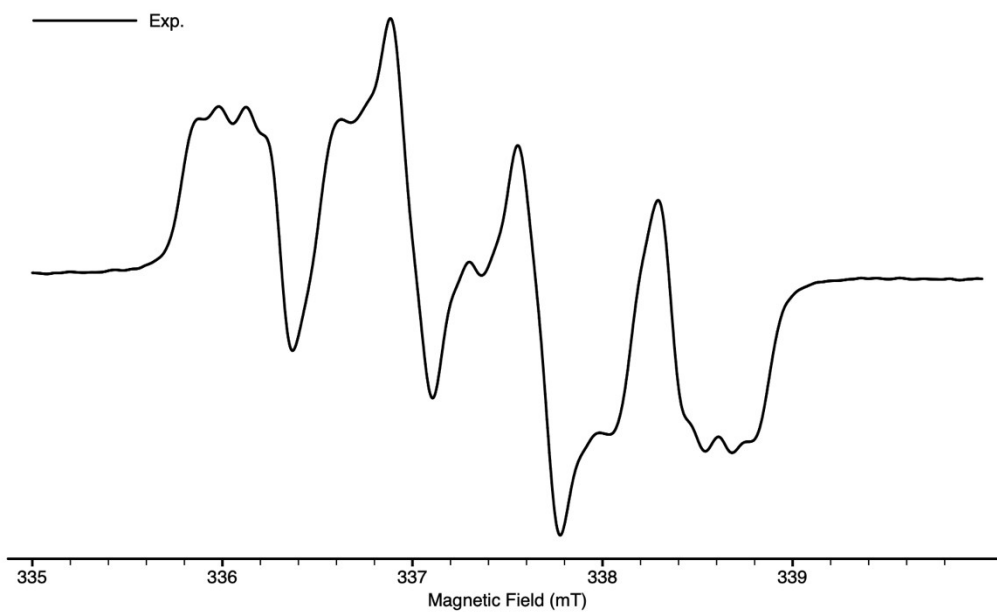

**Figure S6:** Experimental EPR spectrum of 2<sup>•+</sup> in CH<sub>2</sub>Cl<sub>2</sub> at 298 K; frequency = 9.468 GHz, power = 10 mW, modulation = 1 mT.

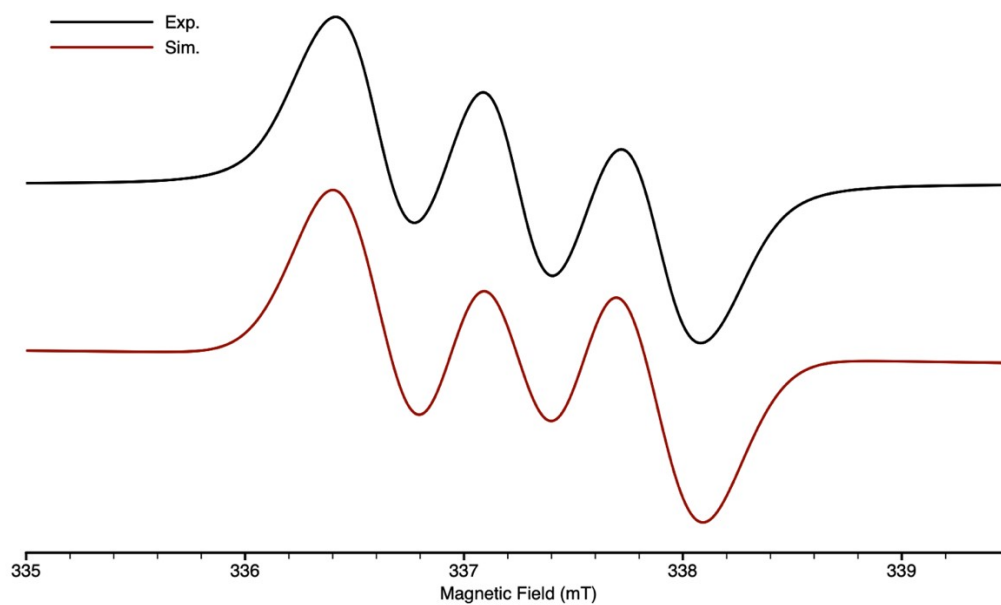

**Figure S7:** Experimental (black) and simulated (red) EPR spectra of  $3^{**}$  in  $CH_2Cl_2$  at 298 K; frequency = 9.468 GHz, power = 10 mW, modulation = 1 mT, simulation parameters:  $S = 1$ ,  $g = 2.0058$ ,  $A = 17.113$ ,  $lw = 0.5569$ .

## S5 Lewis Acidity Assessment

### S5.1 Gutmann-Beckett Analysis of **3**, **3<sup>+</sup>** and **B(C<sub>6</sub>F<sub>5</sub>)<sub>3</sub>**

**General procedure for Gutmann-Beckett tests:** Triethylphosphine oxide (TEPO) (0.0027 g, 0.020 mmol, 1 eq.) and **3**, **3<sup>+</sup>** and **B(C<sub>6</sub>F<sub>5</sub>)<sub>3</sub>** (0.020 mmol, 1 eq.) were dissolved in CD<sub>2</sub>Cl<sub>2</sub> in a J-Young NMR tube. The NMR tube was sealed and <sup>31</sup>P{<sup>1</sup>H} NMR spectra were recorded. The acceptor number (AN) was calculated using the following formula:  $AN = 2.21(\delta_{sample} - 41)_{7,8}$

**Table S1:** Gutmann-Beckett analysis of compounds **1** and **2** using stoichiometric amounts of TEPO, including <sup>31</sup>P chemical shifts, full width at half maximum, and acceptor numbers

| Compound                                         | <sup>31</sup> P Chemical Shift (ppm) | Full Width at Half Maximum (FWHM, Hz) | Acceptor Number (AN) |
|--------------------------------------------------|--------------------------------------|---------------------------------------|----------------------|
| <b>3</b>                                         | 50.5                                 | 2.0                                   | 0                    |
| <b>3<sup>+</sup></b>                             | 64.4                                 | 2223.5                                | 52                   |
| <b>B(C<sub>6</sub>F<sub>5</sub>)<sub>3</sub></b> | 77.2                                 | 10.4                                  | 80                   |

### NMR spectra of Gutmann-Beckett tests with **3**, **3<sup>+</sup>** and **B(C<sub>6</sub>F<sub>5</sub>)<sub>3</sub>**

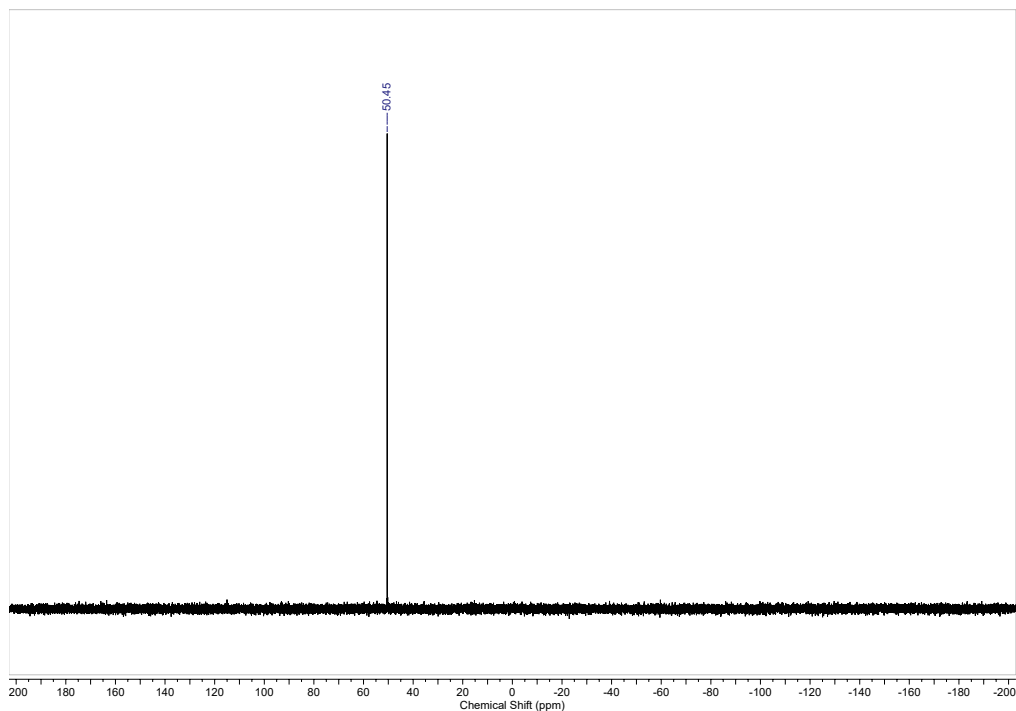

**Figure S8:** <sup>31</sup>P{<sup>1</sup>H} NMR spectrum of equimolar triethylphosphine oxide and **3**.

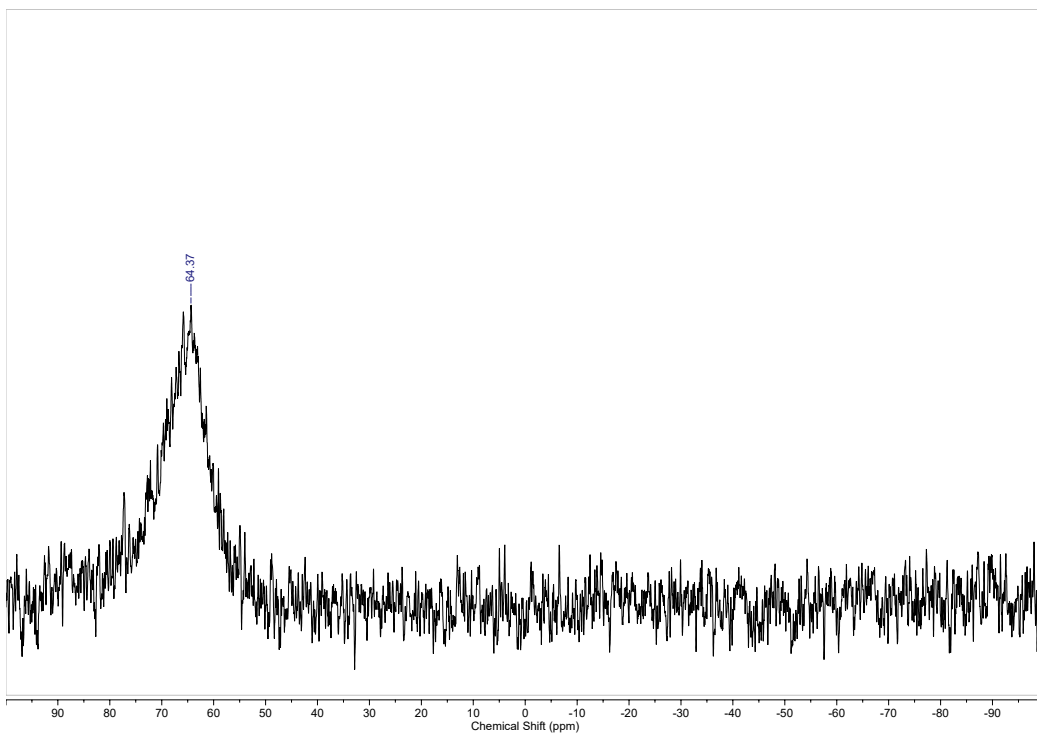

**Figure S9:**  $^{31}\text{P}\{^1\text{H}\}$  NMR spectrum of equimolar triethylphosphine oxide and  $3^+$ .

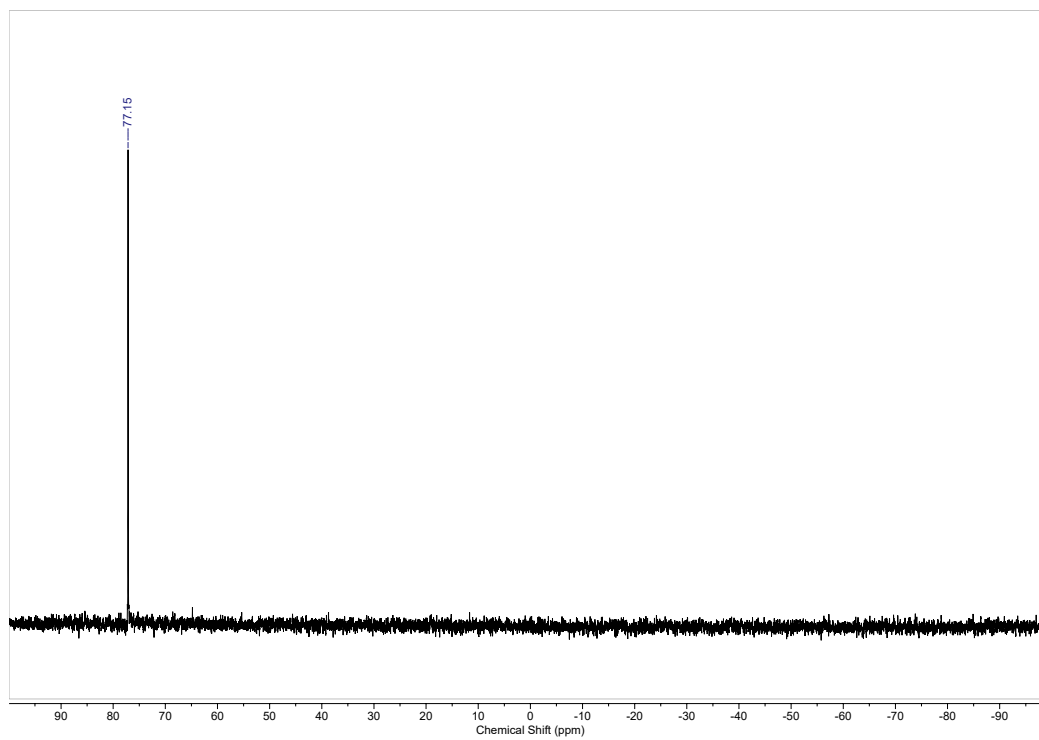

**Figure S10:**  $^{31}\text{P}\{^1\text{H}\}$  NMR spectrum of equimolar triethylphosphine oxide and  $\text{B}(\text{C}_6\text{F}_5)_3$ .

## S5.2 Computational Lewis Acidity Assessment

Fluoride ion affinity (FIA), hydride ion affinity (HIA), and ammonia affinity (AA) calculations were completed using Gaussian 16 suite of quantum chemistry programs.<sup>9</sup> The geometry optimizations of all molecules were carried out using B3LYP<sup>10,11</sup> level of theory and 6-31+G(d,p)<sup>12-14</sup> basis sets with conductor-like polarizable continuum (CPCM) dichloromethane solvation model.<sup>15</sup> The optimized structures were subjected to normal mode frequency calculations using the same computational methods. The results of the frequency analysis contained zero imaginary frequencies, showing that these structures converge to a stationary point on the potential energy surface. Thermochemical parameters, such as enthalpies, were obtained from the frequency calculations and used to determine the FIA, HIA and AA values following previously developed methods.<sup>16-18</sup>

**Table S2:** Computational assessment of Lewis acidity<sup>[a]</sup>

| Compound                                       | FIA <sub>gas</sub><br>(kJ/mol) | FIA <sub>solv</sub> <sup>[b]</sup><br>(kJ/mol) | HIA <sub>gas</sub><br>(kJ/mol) | HIA <sub>solv</sub> <sup>[b]</sup><br>(kJ/mol) | AA <sub>gas</sub><br>(kJ/mol) | AA <sub>solv</sub> <sup>[b]</sup><br>(kJ/mol) |
|------------------------------------------------|--------------------------------|------------------------------------------------|--------------------------------|------------------------------------------------|-------------------------------|-----------------------------------------------|
| SbF <sub>5</sub>                               | 496 <sup>[16]</sup>            | 362 <sup>[16]</sup>                            | 535 <sup>[19]</sup>            | 540 <sup>[19]</sup>                            | 163 <sup>[19]</sup>           | 184 <sup>[19]</sup>                           |
| B(C <sub>6</sub> F <sub>5</sub> ) <sub>3</sub> | 444 <sup>[16]</sup>            | 216 <sup>[16]</sup>                            | 484 <sup>[19]</sup>            | 416 <sup>[19]</sup>                            | 122 <sup>[19]</sup>           | 134 <sup>[19]</sup>                           |
| <b>3</b>                                       | 243                            | 165                                            | 473                            | 234                                            | 22                            | 25                                            |
| <b>3<sup>+</sup></b>                           | 507                            | 213                                            | 763                            | 285                                            | 33                            | 33                                            |

[a] All calculations were performed using B3LYP/6-31+g(d,p) basis sets. [b] Solvated enthalpies were calculated with conductor-like polarizable continuum (CPCM)

## S6 Stoichiometric Experiments

**Addition of DMAP to 3<sup>++</sup>:** a solution of 4-dimethylaminopyridine (DMAP, 1.6 mg, 0.132 mmol) in CDCl<sub>3</sub> was added to a solution of 3<sup>++</sup> (10 mg, 0.132 mmol) and transferred to an NMR tube in the glovebox. The NMR tube was sealed with Parafilm and <sup>1</sup>H NMR spectroscopy was performed on the mixture.

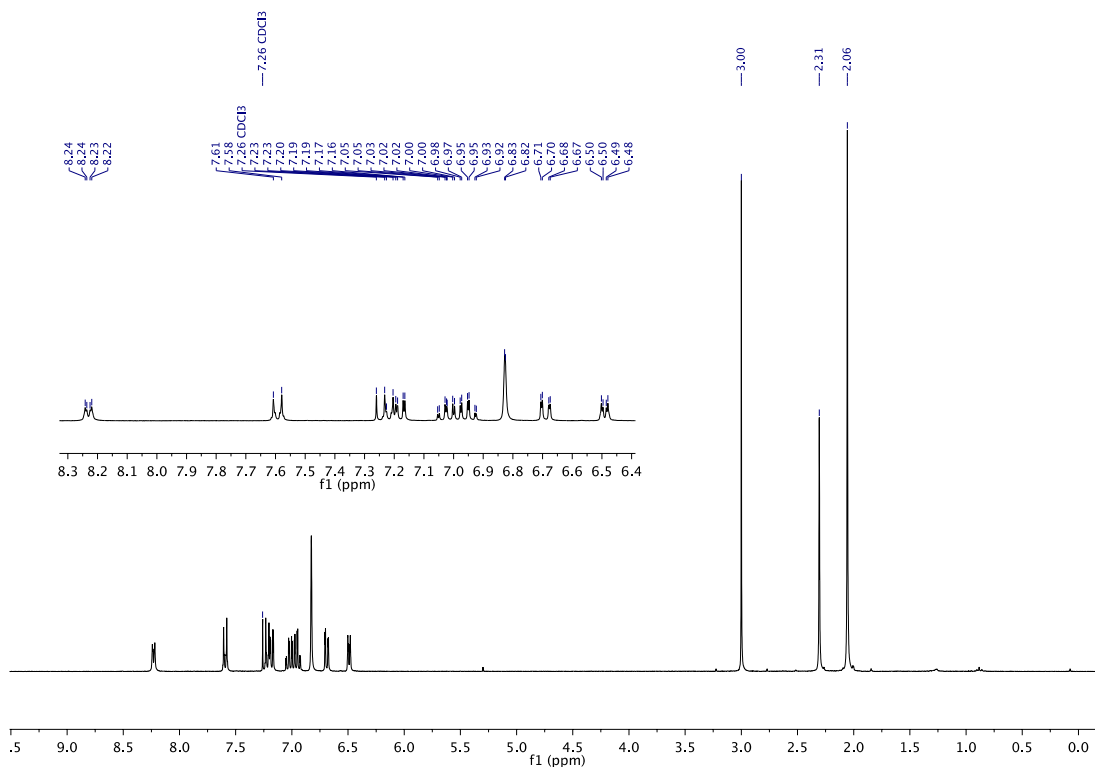

**Figure S11:** <sup>1</sup>H NMR spectrum of the control experiment of 3 and DMAP in CDCl<sub>3</sub>.

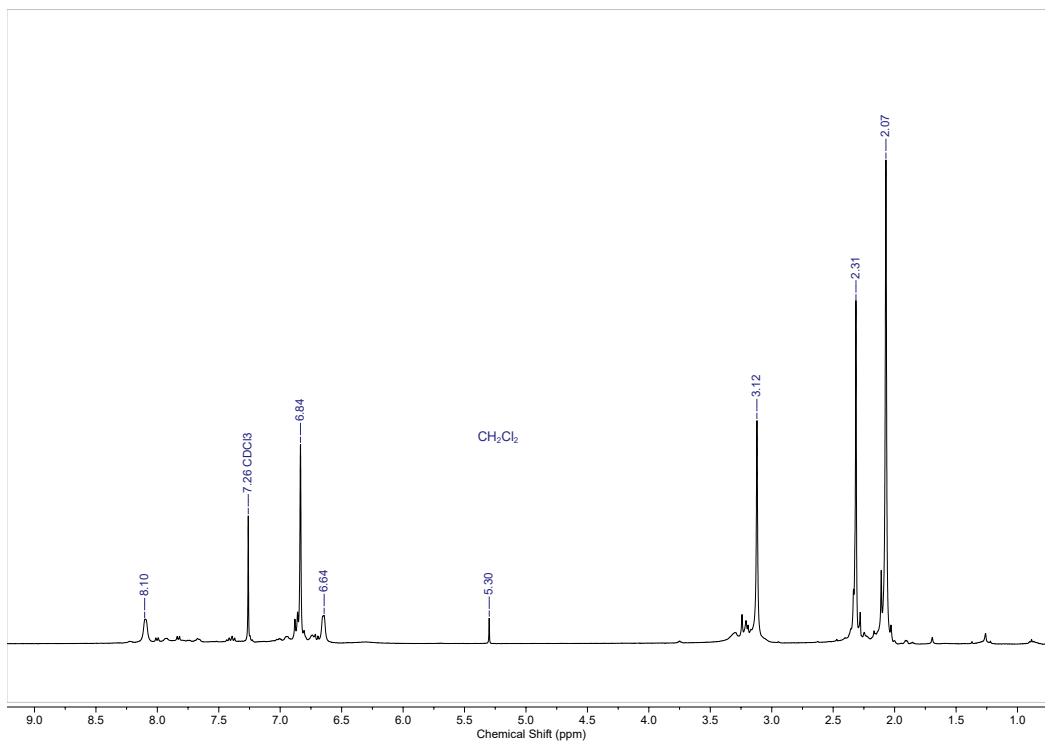

Figure S12: <sup>1</sup>H NMR spectrum of 3<sup>+</sup> and DMAP in CDCl<sub>3</sub>.

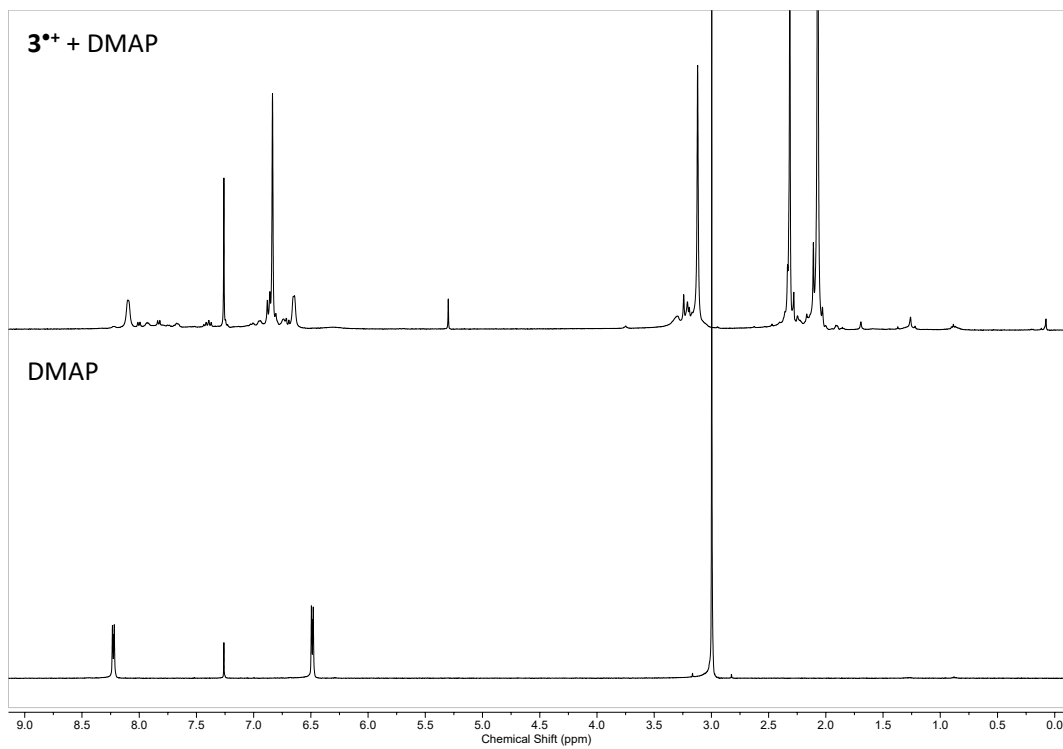

Figure S13: Stacked <sup>1</sup>H NMR spectra of 3<sup>+</sup> and DMAP in CDCl<sub>3</sub>.



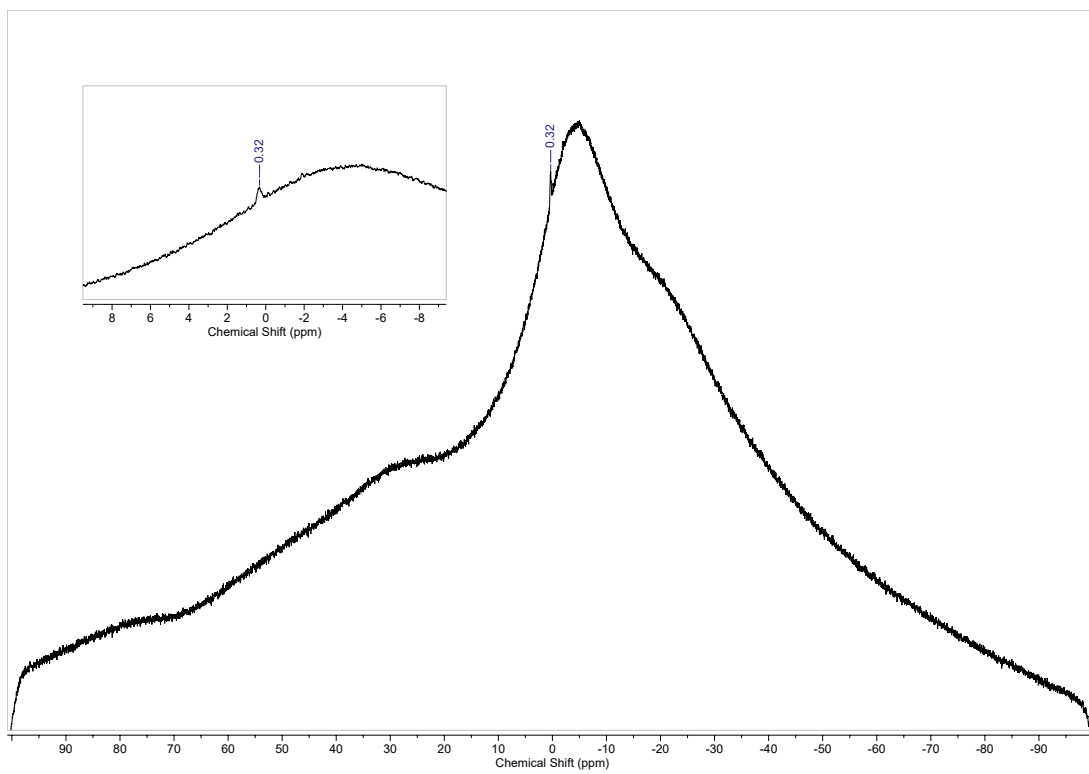

Figure S14:  $^{11}\text{B}\{^1\text{H}\}$  NMR spectrum of  $3^+$  and DMAP in  $\text{CDCl}_3$ .

**Addition of HSiEt<sub>3</sub> to 3<sup>+</sup>**: a solution of triethylsilane (1.6 mg, 0.132 mmol) in CDCl<sub>3</sub> was added to a solution of 3<sup>+</sup> (10 mg, 0.132 mmol) and transferred to an J Young tapped NMR tube in the glovebox. The NMR tube was sealed and <sup>1</sup>H and <sup>1</sup>H-<sup>29</sup>Si heteronuclear multiple bond correlation (HMBC) NMR spectroscopy was performed on the mixture. NMR chemical shifts of FSiEt<sub>3</sub> is consistent with literature reports.

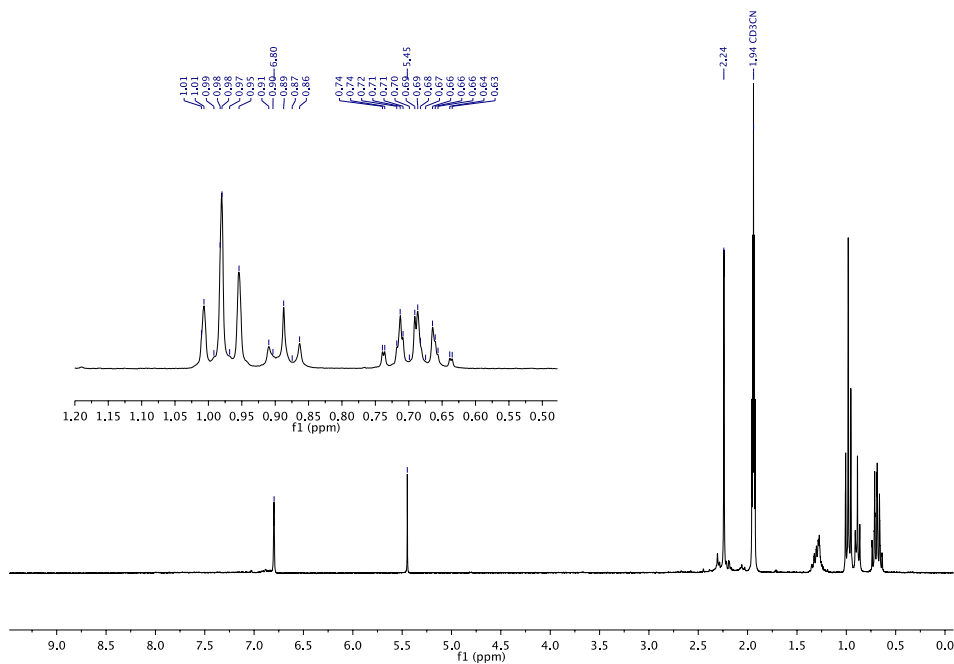

Figure S15: <sup>1</sup>H NMR spectrum of 3<sup>+</sup> and HSiEt<sub>3</sub> in CD<sub>3</sub>CN.

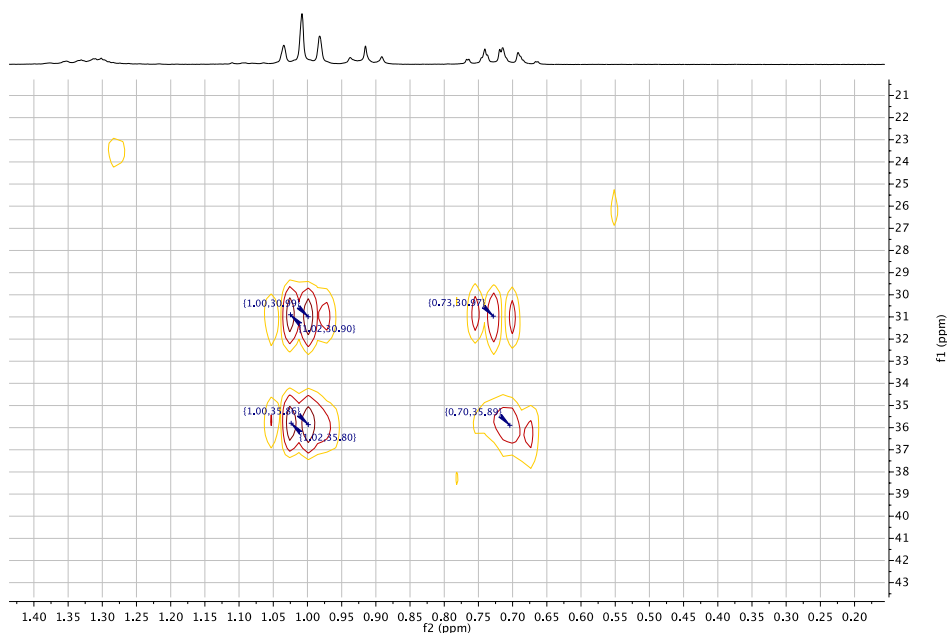

Figure S16: <sup>1</sup>H-<sup>29</sup>Si HMBC NMR spectrum of 3<sup>+</sup> and HSiEt<sub>3</sub> in CD<sub>3</sub>CN.

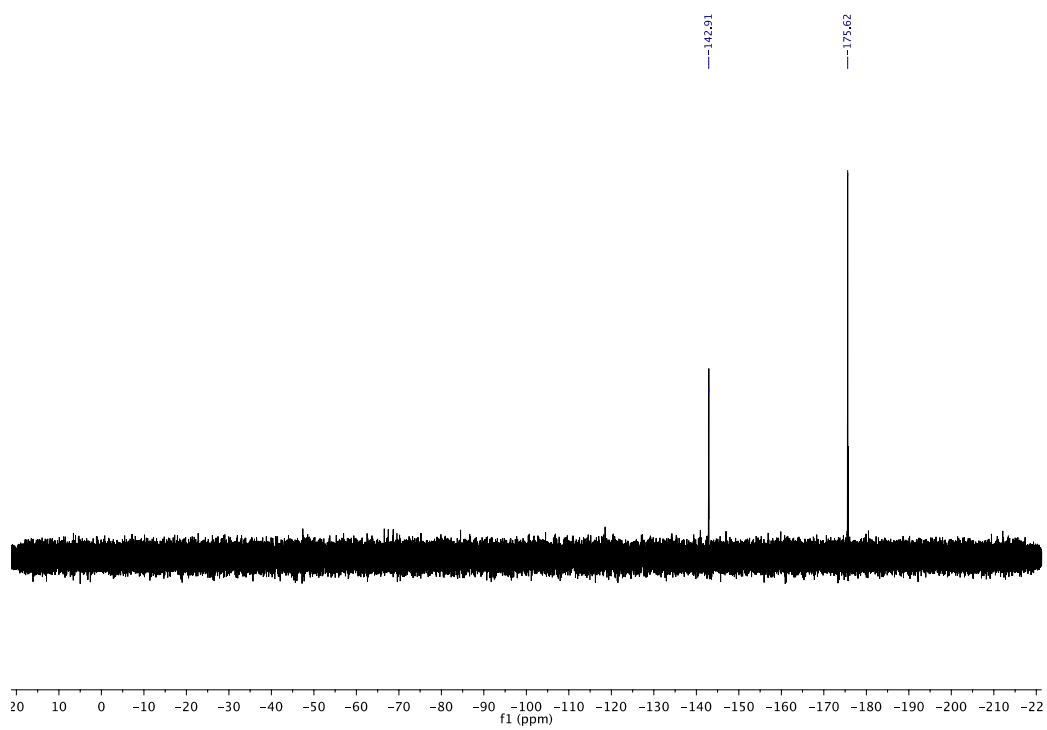

Figure S17:  $^{19}\text{F}\{^1\text{H}\}$  NMR spectrum of  $3^+$  and  $\text{HSiEt}_3$  in  $\text{CD}_3\text{CN}$ .

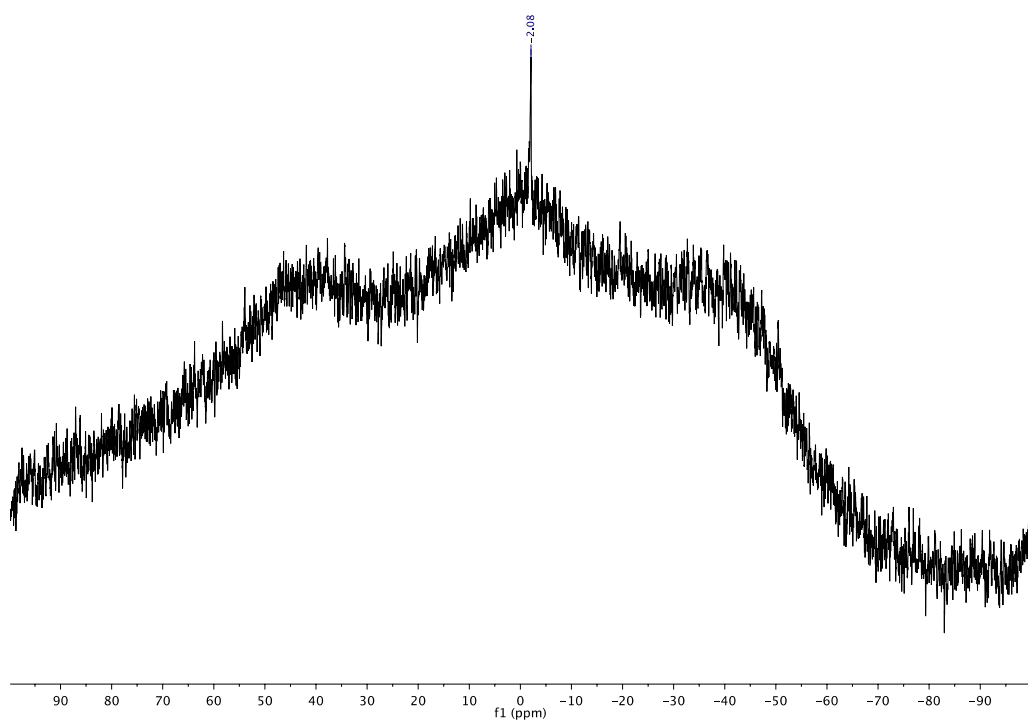

Figure S18:  $^{11}\text{B}\{^1\text{H}\}$  NMR spectrum of  $3^+$  and  $\text{HSiEt}_3$  in  $\text{CD}_3\text{CN}$ .

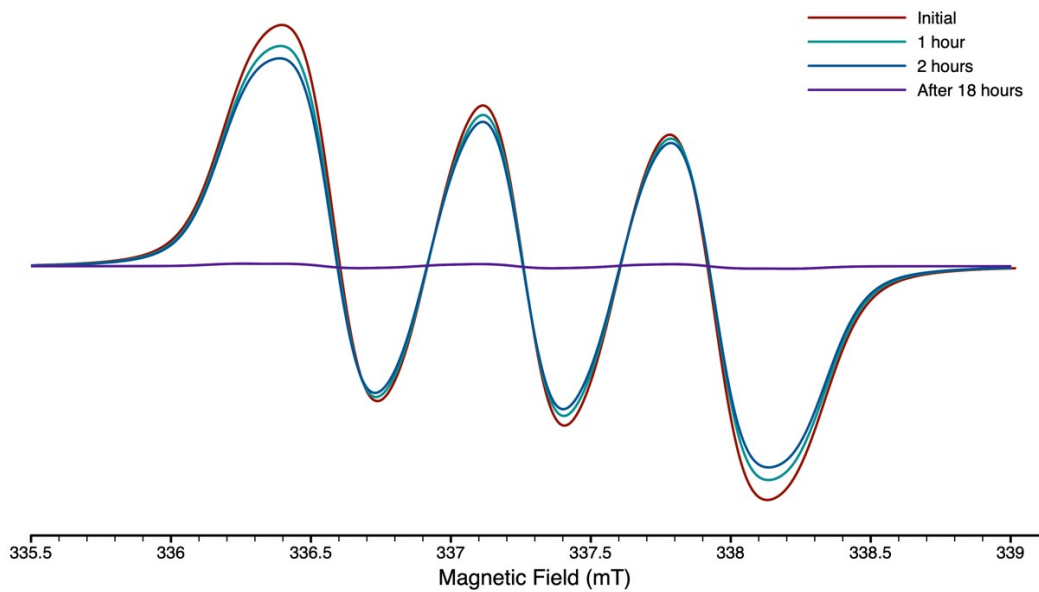

**Figure S19:** Overlaid experimental EPR spectra of  $3^{*+}$  and  $\text{HSiEt}_3$  in  $\text{CD}_3\text{CN}$  after 1 hour, 2 hours, and 18 hours; frequency = 9.468 GHz, power = 10 mW, modulation = 1 mT.

**Addition of 9,10-dihydroanthracene:** a solution containing the 9,10-dihydroanthracene (0.5 mg, 0.028 mmol, 1eq.) was added to a solution of **3\*\*** (4.2 mg, 0.056 mmol, 2 eq.) in 0.6 mL of CD<sub>3</sub>CN. The mixture was dispensed into sealed NMR tubes, sealed with Parafilm, and allowed to react over time at room temperature for 2 days and then heated to 40 °C while monitoring *via* <sup>1</sup>H NMR spectroscopy. A control experiment heating 9,10-dihydroanthracene without catalyst was performed in parallel. The reaction was complete upon consumption of starting material or no observable progression in conversion. Chemical shifts of the silyl ether products were consistent with the literature.

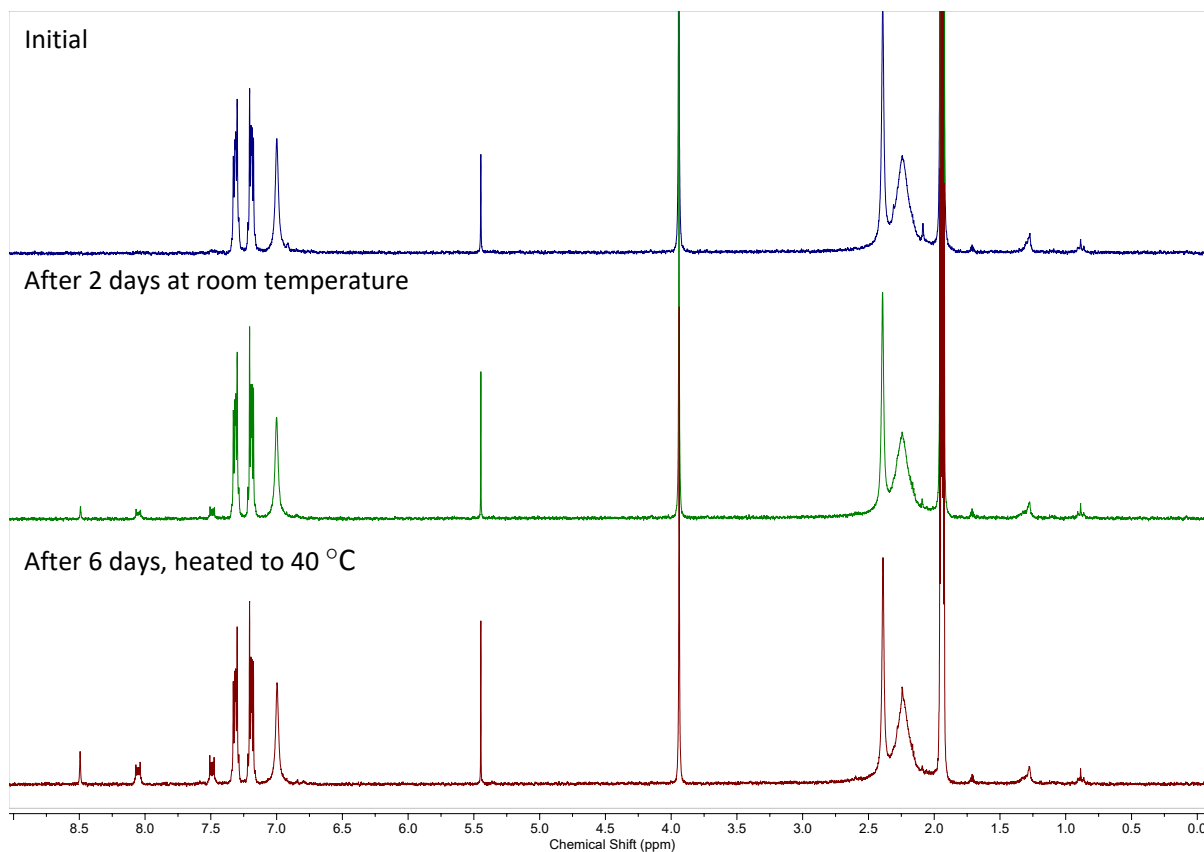

**Figure S20:** <sup>1</sup>H NMR spectrum of **3\*\*** and 9,10-dihydroanthracene in CD<sub>3</sub>CN.

## S7 Catalytic Experiments

**General procedure for hydrosilylation experiments:** a mixture containing the corresponding carbonyl substrate (0.100 mmol, 1 eq.), triethylsilane (0.110 mmol, 1.1 eq.), and **3**<sup>++</sup> (3.6 mg, 0.005 mmol, 5 mol %) in 0.6 mL deuterated solvent (CDCl<sub>3</sub> or CD<sub>3</sub>CN) was prepared. The mixture was dispensed into sealed NMR tubes, sealed with Parafilm, and allowed to react over time while monitoring *via* quantitative <sup>1</sup>H NMR spectroscopy. Control experiments for the hydrosilylation reactions without catalyst were performed in parallel. The reaction was complete upon consumption of starting material or no observable progression in conversion. Chemical shifts of the silyl ether products were consistent with the literature.

*((Triethylsiloxy)methyl)benzene:*

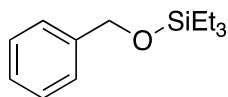

**<sup>1</sup>H NMR** (600 MHz, CD<sub>3</sub>CN) δ: 7.38-7.27 (m, 5H), 4.55 (s, 2H), 0.95 (t, 9H, *J* = 7.9 Hz), 0.54 (q, 6H, *J* = 7.9 Hz).

*1,1'-(((Triethylsilyl)oxy)methylene)bisbenzene:*

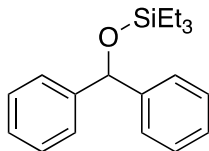

**<sup>1</sup>H NMR** (300 MHz, CD<sub>3</sub>CN) δ: 7.36 – 7.12 (m, 10H), 3.99 (s, 1H), 0.97 (t, *J* = 7.9 Hz, 9H), 0.57 (q, *J* = 7.8 Hz, 6H).

*4-Bromo((triethylsiloxy)methyl)benzene:*

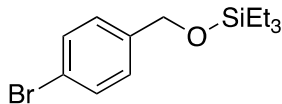

**<sup>1</sup>H NMR** (300 MHz, CD<sub>3</sub>CN) δ: 7.54 (d, *J* = 8.3 Hz, 2H), 7.31 (d, *J* = 8.3 Hz, 2H), 4.54 (s, 2H), 0.97 (t, *J* = 7.9 Hz, 9H), 0.57 (q, *J* = 7.9 Hz, 6H).

*4-Trifluoromethyl((triethylsiloxy)methyl)benzene:*

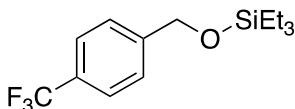

**<sup>1</sup>H NMR** (300 MHz, CD<sub>3</sub>CN) δ: 7.71 (d, *J* = 8.1 Hz, 2H), 7.59 (d, *J* = 8.1 Hz, 2H), 4.70 (s, 2H), 0.97 (t, *J* = 7.9 Hz, 9H), 0.57 (q, *J* = 7.9 Hz, 6H).

((Triethylsilyl)oxy)cyclohexane:

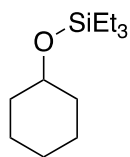

**<sup>1</sup>H NMR** (600 MHz, CD<sub>3</sub>CN) δ: 3.34 (s, 1H), 1.81 (m, 2H), 1.69 (m, 2H), 1.51 (m, 1H), 1.30-1.14 (m, 4H), 0.94 (t, *J* = 8.0 Hz, 9H), 0.54 (q, *J* = 8.0 Hz, 6H).

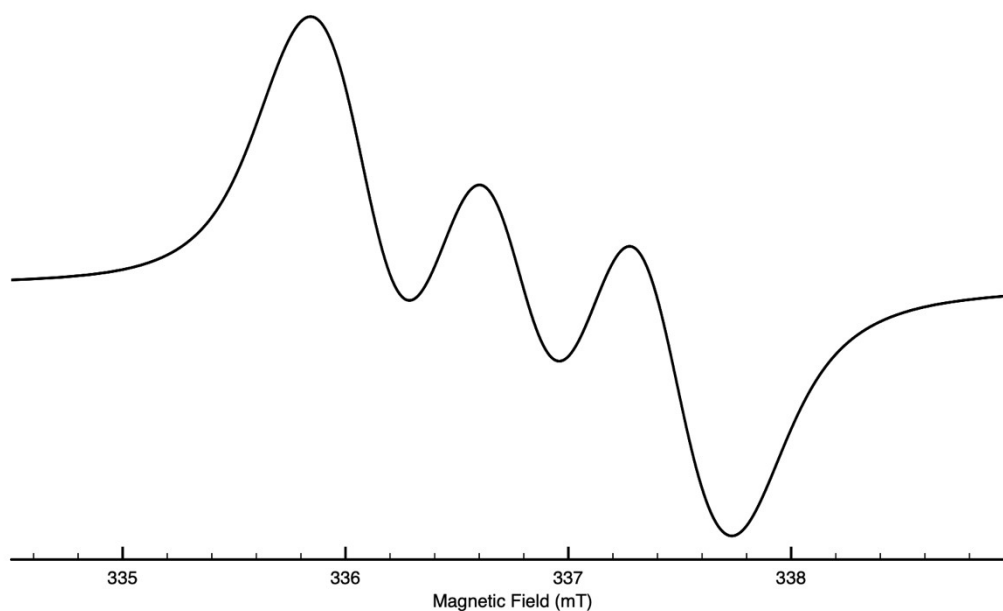

**Figure S21:** Experimental EPR spectra of **3\*\*** in CH<sub>2</sub>Cl<sub>2</sub> at 298 K after completion of the hydrosilylation of 4-bromobenzaldehyde, frequency = 9.468 GHz, power = 10 mW, modulation = 1 mT.

## S8 Computational Details

### S8.1 Optimized Coordinates for Lewis Acidity Assessment

(10-Phenylphenothiazinyl)dimesitylborane (3)

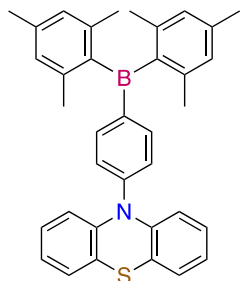

|   |             |             |             |
|---|-------------|-------------|-------------|
| C | -4.84537100 | 2.40102500  | 1.91248300  |
| C | -4.19901200 | 1.23211400  | 1.49503700  |
| C | -3.23983400 | 1.28051200  | 0.44443500  |
| C | -2.98969600 | 2.53964200  | -0.16525500 |
| C | -3.68149500 | 3.68060900  | 0.26174500  |
| C | -4.60505700 | 3.63948500  | 1.30872300  |
| H | -5.56612800 | 2.33982600  | 2.72564400  |
| H | -3.49373800 | 4.62709400  | -0.24200600 |
| B | -2.47345600 | -0.02300000 | -0.02705400 |
| C | -3.22752200 | -1.33355200 | -0.49788600 |
| C | -2.96251900 | -2.59091900 | 0.10989400  |
| C | -4.18897000 | -1.29421000 | -1.54671900 |
| C | -3.64254800 | -3.73855700 | -0.31762400 |
| C | -4.82310300 | -2.46966100 | -1.96482600 |
| C | -4.56799500 | -3.70613600 | -1.36339000 |
| H | -3.44334500 | -4.68369900 | 0.18423400  |
| H | -5.54546700 | -2.41537400 | -2.77701100 |
| C | -4.53986300 | -0.05725000 | 2.21692200  |
| H | -4.93865100 | -0.81257100 | 1.53391600  |
| H | -3.66317200 | -0.49708800 | 2.70569300  |
| H | -5.28721100 | 0.12382200  | 2.99461000  |
| C | -2.00871800 | 2.71577000  | -1.31141700 |
| H | -1.96324900 | 1.84631700  | -1.97142000 |
| H | -2.28650400 | 3.58083200  | -1.92151600 |
| H | -0.99068300 | 2.88681000  | -0.94359700 |
| C | -5.30770900 | 4.88888700  | 1.78548100  |
| H | -6.33605500 | 4.67614100  | 2.09539600  |
| H | -4.79129100 | 5.32487800  | 2.65029500  |
| H | -5.33890500 | 5.65347300  | 1.00328600  |
| C | -1.97812600 | -2.75858000 | 1.25451600  |
| H | -1.94098200 | -1.88891900 | 1.91494300  |
| H | -2.24758000 | -3.62640400 | 1.86444100  |
| H | -0.95890900 | -2.92031800 | 0.88592300  |
| C | -4.54430900 | -0.00819600 | -2.26762400 |
| H | -4.94589100 | 0.74444900  | -1.58335700 |
| H | -3.67375700 | 0.43812200  | -2.76152100 |
| H | -5.29405100 | -0.19615000 | -3.04135500 |
| C | -5.25598400 | -4.96314200 | -1.84144100 |



|   |             |             |             |
|---|-------------|-------------|-------------|
| H | -4.71694800 | -5.40875100 | -2.68736900 |
| H | -5.30455200 | -5.71811000 | -1.05074200 |
| H | -6.27672400 | -4.75694500 | -2.17933100 |
| C | -0.89713200 | -0.01648800 | -0.02682800 |
| C | -0.15689400 | -0.83396700 | -0.90627400 |
| C | -0.16277400 | 0.80598500  | 0.85451500  |
| C | 1.23842600  | -0.82449400 | -0.91899100 |
| H | -0.68646500 | -1.48613700 | -1.59563200 |
| C | 1.23180300  | 0.80120700  | 0.87322200  |
| H | -0.69769700 | 1.45670800  | 1.54125800  |
| C | 1.93921800  | -0.01319600 | -0.02132100 |
| H | 1.79679800  | -1.44871900 | -1.61012200 |
| H | 1.77781000  | 1.43121800  | 1.56967700  |
| C | 4.05746600  | 0.97871400  | -0.76827100 |
| C | 4.05606200  | -0.82911500 | 0.92230400  |
| C | 3.40178500  | 2.14803800  | -1.18954200 |
| C | 5.41954600  | 0.82775900  | -1.09948500 |
| C | 5.41871100  | -1.14820700 | 0.75035600  |
| C | 3.39960400  | -1.33148000 | 2.05881700  |
| C | 4.08140200  | 3.13257900  | -1.91033700 |
| H | 2.35208800  | 2.28647900  | -0.96405500 |
| C | 6.10299200  | 1.83567800  | -1.78360400 |
| C | 6.10227200  | -1.89817500 | 1.71020800  |
| H | 2.34913400  | -1.11931100 | 2.21140900  |
| C | 4.07965200  | -2.11639700 | 2.99280200  |
| C | 5.43706100  | 2.98901400  | -2.20377200 |
| H | 3.54162500  | 4.01867700  | -2.23096900 |
| H | 7.15764900  | 1.69892000  | -2.00408400 |
| C | 5.43608500  | -2.39663100 | 2.83174500  |
| H | 7.15727900  | -2.10765200 | 1.55955100  |
| H | 3.53916200  | -2.49787300 | 3.85401600  |
| H | 5.97192600  | 3.75779000  | -2.75233800 |
| H | 5.97116400  | -2.99504100 | 3.56223200  |
| S | 6.25144200  | -0.70914000 | -0.76062300 |
| N | 3.37897000  | -0.03760500 | -0.04377700 |

(10-Phenylphenothiazinyl)dimesitylborane radical cation ( $3^{\bullet+}$ )

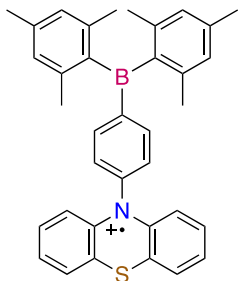

|   |             |            |             |
|---|-------------|------------|-------------|
| C | -4.85774200 | 2.33824100 | 1.93187500  |
| C | -4.20588900 | 1.18473600 | 1.48431800  |
| C | -3.18858700 | 1.28137300 | 0.49861800  |
| C | -2.88293500 | 2.56199100 | -0.02922000 |
| C | -3.58105400 | 3.68899900 | 0.41866100  |

|   |             |             |             |
|---|-------------|-------------|-------------|
| C | -4.56309600 | 3.60265500  | 1.41003100  |
| H | -5.62391200 | 2.24753800  | 2.69858600  |
| H | -3.35520500 | 4.65838600  | -0.02022800 |
| B | -2.43667800 | 0.00002600  | -0.00005400 |
| C | -3.18862300 | -1.28131300 | -0.49869000 |
| C | -2.88299700 | -2.56188000 | 0.02914200  |
| C | -4.20604300 | -1.18465800 | -1.48434500 |
| C | -3.58124100 | -3.68890800 | -0.41866600 |
| C | -4.85798500 | -2.33809300 | -1.93177900 |
| C | -4.56336300 | -3.60254700 | -1.40987900 |
| H | -3.35537200 | -4.65829200 | 0.02020500  |
| H | -5.62422600 | -2.24738600 | -2.69842700 |
| C | -4.61275400 | -0.14412500 | 2.08637700  |
| H | -5.10461100 | -0.78222300 | 1.34609700  |
| H | -3.75382100 | -0.70437500 | 2.46798400  |
| H | -5.30607200 | 0.00796800  | 2.91772000  |
| C | -1.84512000 | 2.76407300  | -1.11632200 |
| H | -1.83280400 | 1.94695200  | -1.84210800 |
| H | -2.04083100 | 3.69175600  | -1.66116000 |
| H | -0.83506900 | 2.83227600  | -0.69851100 |
| C | -5.27062900 | 4.83537800  | 1.91574200  |
| H | -6.30106600 | 4.61164300  | 2.20785800  |
| H | -4.76212600 | 5.24105800  | 2.79930400  |
| H | -5.28880000 | 5.62355900  | 1.15754800  |
| C | -1.84510900 | -2.76405300 | 1.11615800  |
| H | -1.83247900 | -1.94682000 | 1.84180800  |
| H | -2.04100800 | -3.69159400 | 1.66117300  |
| H | -0.83512700 | -2.83261300 | 0.69823300  |
| C | -4.61281900 | 0.14422600  | -2.08640900 |
| H | -5.10445600 | 0.78244000  | -1.34608500 |
| H | -3.75385700 | 0.70432300  | -2.46818400 |
| H | -5.30628900 | -0.00781000 | -2.91763500 |
| C | -5.27132800 | -4.83505900 | -1.91550600 |
| H | -4.76985100 | -5.23418300 | -2.80603100 |
| H | -5.27982300 | -5.62722800 | -1.16135000 |
| H | -6.30522400 | -4.61332800 | -2.19686700 |
| C | -0.86551400 | 0.00001400  | -0.00005200 |
| C | -0.14082400 | -0.72112200 | -0.96712700 |
| C | -0.14081900 | 0.72112800  | 0.96703700  |
| C | 1.25270700  | -0.71374400 | -0.98727200 |
| H | -0.67856800 | -1.29383700 | -1.71630300 |
| C | 1.25271100  | 0.71373100  | 0.98719000  |
| H | -0.67855900 | 1.29384100  | 1.71621800  |
| C | 1.92928900  | 0.00000600  | -0.00005200 |
| H | 1.81077800  | -1.25810100 | -1.74180700 |
| H | 1.81078500  | 1.25807300  | 1.74173400  |
| C | 4.01902200  | 1.00291000  | -0.72529200 |
| C | 4.01886500  | -1.00298500 | 0.72525200  |
| C | 3.24685900  | 1.96501300  | -1.41896500 |
| C | 5.43435100  | 1.10142200  | -0.79941100 |
| C | 5.43416800  | -1.10165800 | 0.79949500  |

|   |            |             |             |
|---|------------|-------------|-------------|
| C | 3.24650900 | -1.96498000 | 1.41884100  |
| C | 3.85715400 | 2.96846400  | -2.14701100 |
| H | 2.16850400 | 1.91413300  | -1.37856400 |
| C | 6.03758000 | 2.12964500  | -1.54651200 |
| C | 6.03720200 | -2.12995300 | 1.54665500  |
| H | 2.16816100 | -1.91394900 | 1.37832100  |
| C | 3.85661000 | -2.96850600 | 2.14694600  |
| C | 5.26000700 | 3.05709600  | -2.21606000 |
| H | 3.24120700 | 3.69243900  | -2.66856800 |
| H | 7.12015700 | 2.18580600  | -1.58998600 |
| C | 5.25944800 | -3.05730900 | 2.21612800  |
| H | 7.11976800 | -2.18624600 | 1.59023300  |
| H | 3.24052200 | -3.69240500 | 2.66844400  |
| H | 5.73221300 | 3.84659900  | -2.78939400 |
| H | 5.73150100 | -3.84686900 | 2.78950900  |
| S | 6.51688300 | -0.00017700 | 0.00008700  |
| N | 3.38153800 | -0.00001200 | -0.00004000 |

*Fluoride adduct of (10-Phenylphenothiazinyl)dimesitylborane (3-F)*

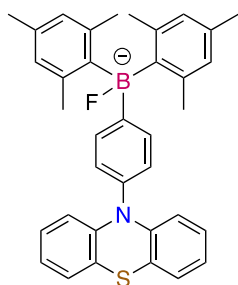

|   |             |             |             |
|---|-------------|-------------|-------------|
| C | -3.96852600 | 3.38913700  | 1.16582200  |
| C | -3.30534100 | 2.18931900  | 1.46524300  |
| C | -3.13056600 | 1.17827000  | 0.48093200  |
| C | -3.58239300 | 1.49371200  | -0.82702100 |
| C | -4.23581900 | 2.70790100  | -1.09904500 |
| C | -4.46410500 | 3.66623400  | -0.11095800 |
| B | -2.34599600 | -0.23159200 | 0.84294900  |
| C | -2.94517600 | -1.55070400 | 0.03202500  |
| C | -4.32006200 | -1.87093400 | 0.23276100  |
| C | -2.21924400 | -2.42775400 | -0.81614100 |
| C | -4.90440000 | -2.99871800 | -0.36033300 |
| C | -2.83700600 | -3.54915600 | -1.40040800 |
| C | -4.17810800 | -3.86286500 | -1.18340900 |
| C | -0.74139300 | 0.06050700  | 0.74669600  |
| C | 0.16658500  | -0.56938300 | 1.61438400  |
| C | -0.16349800 | 0.95615500  | -0.16702300 |
| C | 1.54764300  | -0.36286700 | 1.56057200  |
| H | -0.21705400 | -1.26369700 | 2.35757800  |
| C | 1.21336700  | 1.18058600  | -0.25354100 |
| H | -0.80645900 | 1.50236200  | -0.85274600 |
| C | 2.09629500  | 0.51513300  | 0.61165200  |
| H | 2.19307300  | -0.89404600 | 2.25028500  |

|   |             |             |             |
|---|-------------|-------------|-------------|
| H | 1.59362600  | 1.87202500  | -0.99620200 |
| C | 4.03640500  | 1.30088300  | -0.66298200 |
| C | 4.36866700  | -0.22258400 | 1.15766100  |
| C | 4.05567000  | 2.68327200  | -0.86386300 |
| C | 4.53507400  | 0.45058700  | -1.66211600 |
| C | 4.90899900  | -1.26251300 | 0.38541400  |
| C | 4.67205600  | -0.14776800 | 2.51929100  |
| C | 4.51523300  | 3.21254000  | -2.07127200 |
| H | 3.68456900  | 3.32870500  | -0.07451400 |
| C | 5.01543300  | 0.97851600  | -2.86566200 |
| C | 5.71753300  | -2.23811400 | 0.97909400  |
| H | 4.26168700  | 0.67255500  | 3.09900100  |
| C | 5.46142800  | -1.13063900 | 3.11926200  |
| C | 4.98699000  | 2.35873500  | -3.07431000 |
| H | 4.50998800  | 4.28652000  | -2.22672000 |
| H | 5.41157100  | 0.31443400  | -3.62738200 |
| C | 5.97663500  | -2.17951800 | 2.34976400  |
| H | 6.14227800  | -3.03114500 | 0.37177800  |
| H | 5.67770400  | -1.07558800 | 4.18125400  |
| H | 5.35236600  | 2.76677300  | -4.01136300 |
| H | 6.59712600  | -2.94135800 | 2.81089000  |
| S | 4.56048600  | -1.30910700 | -1.36447800 |
| N | 3.51089500  | 0.74684600  | 0.54746700  |
| F | -2.58602500 | -0.60256600 | 2.27361200  |
| C | -0.76418100 | -2.21923600 | -1.19478600 |
| C | -5.24935600 | -0.98814100 | 1.04581900  |
| C | -4.81207500 | -5.09374400 | -1.78813400 |
| C | -3.38564400 | 0.56586100  | -2.01192700 |
| C | -2.76090000 | 2.05298200  | 2.87419200  |
| C | -5.21085100 | 4.94608500  | -0.40658200 |
| H | -5.95931900 | -3.20233100 | -0.17931000 |
| H | -2.24548400 | -4.19427400 | -2.04855400 |
| H | -4.08536000 | 4.13538500  | 1.95104800  |
| H | -4.56775100 | 2.90954600  | -2.11681000 |
| H | -5.14853200 | 5.20753400  | -1.46795400 |
| H | -4.81350500 | 5.78491000  | 0.17506500  |
| H | -6.27579600 | 4.85517500  | -0.15547300 |
| H | -2.80524300 | 3.01722100  | 3.39212700  |
| H | -3.32145500 | 1.31864000  | 3.45896000  |
| H | -1.72340300 | 1.70814500  | 2.86525600  |
| H | -3.53723500 | 1.11376500  | -2.94807700 |
| H | -2.38431100 | 0.13156000  | -2.03269100 |
| H | -4.08755900 | -0.27361300 | -1.99437100 |
| H | -5.52310700 | -0.08976600 | 0.48092000  |
| H | -6.17282800 | -1.52517700 | 1.28779800  |
| H | -5.84436100 | -4.90049000 | -2.09976000 |
| H | -4.84271600 | -5.92220200 | -1.06841900 |
| H | -4.25184100 | -5.44128700 | -2.66206000 |
| H | -4.78130700 | -0.64885900 | 1.96957800  |
| H | -0.59188700 | -1.23524800 | -1.63885000 |
| H | -0.09576100 | -2.28094400 | -0.33310900 |

H -0.45375700 -2.97702900 -1.92146500

*Fluoride adduct of (10-Phenylphenothiazinyl)dimesitylborane radical cation (3<sup>•+</sup>-F)*

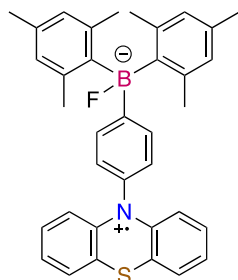

|   |            |             |             |
|---|------------|-------------|-------------|
| C | 5.46534600 | -2.35342500 | 0.75177200  |
| C | 4.66307800 | -1.21089700 | 0.87112300  |
| C | 3.27497300 | -1.24028300 | 0.54619200  |
| C | 2.76681800 | -2.48304500 | 0.08744200  |
| C | 3.60086500 | -3.61073800 | -0.02497600 |
| C | 4.95447400 | -3.57519700 | 0.30612700  |
| H | 6.52171800 | -2.28387600 | 1.00797400  |
| H | 3.17301000 | -4.54484100 | -0.38554800 |
| B | 2.42036700 | 0.15656900  | 0.79067300  |
| C | 2.97357400 | 1.45372900  | -0.06963100 |
| C | 2.86981800 | 2.77029500  | 0.45687800  |
| C | 3.48007100 | 1.34247900  | -1.39093700 |
| C | 3.32446500 | 3.88025600  | -0.27093800 |
| C | 3.92009300 | 2.47444500  | -2.09747600 |
| C | 3.87432600 | 3.75674300  | -1.54932800 |
| H | 3.23171200 | 4.87188100  | 0.17023600  |
| H | 4.30367400 | 2.34618700  | -3.10866300 |
| C | 5.36776800 | 0.05987000  | 1.30824000  |
| H | 5.50026000 | 0.74204000  | 0.46116100  |
| H | 4.79574800 | 0.60178600  | 2.06159800  |
| H | 6.35927900 | -0.17183400 | 1.71070000  |
| C | 1.32880800 | -2.69561400 | -0.35058700 |
| H | 1.04007700 | -2.01769500 | -1.15867700 |
| H | 1.19356700 | -3.72011800 | -0.71089800 |
| H | 0.61701400 | -2.52840200 | 0.46114400  |
| C | 5.82596600 | -4.80552800 | 0.21295700  |
| H | 6.82123600 | -4.56256800 | -0.17476500 |
| H | 5.96855900 | -5.26864200 | 1.19782500  |
| H | 5.37984300 | -5.56012100 | -0.44240600 |
| C | 2.24019800 | 3.06131300  | 1.80593900  |
| H | 2.87252300 | 2.72422700  | 2.63158200  |
| H | 2.06735100 | 4.13689800  | 1.91806100  |
| H | 1.28480500 | 2.54219000  | 1.92215800  |
| C | 3.57386100 | 0.02075700  | -2.13127400 |
| H | 4.40402500 | -0.59235200 | -1.76762200 |
| H | 2.67172200 | -0.58386800 | -2.01701400 |
| H | 3.72815100 | 0.19906100  | -3.20046200 |
| C | 4.39616600 | 4.95798800  | -2.30222500 |

|   |             |             |             |
|---|-------------|-------------|-------------|
| H | 4.36877900  | 4.79310300  | -3.38412700 |
| H | 3.81032000  | 5.85581700  | -2.07846000 |
| H | 5.43757100  | 5.17607500  | -2.03211000 |
| C | 0.79812600  | 0.10019400  | 0.56623200  |
| C | 0.17835800  | 0.44756300  | -0.64849800 |
| C | -0.05493500 | -0.26076400 | 1.62640900  |
| C | -1.20403500 | 0.38839200  | -0.82637600 |
| H | 0.79198400  | 0.77075800  | -1.48376600 |
| C | -1.44166000 | -0.32343300 | 1.48295400  |
| H | 0.38426600  | -0.50868400 | 2.58751500  |
| C | -1.99973900 | -0.00853500 | 0.24604800  |
| H | -1.66367700 | 0.64442000  | -1.77638900 |
| H | -2.08381500 | -0.61728600 | 2.30811600  |
| C | -3.95714200 | -1.32204100 | -0.33961300 |
| C | -4.19015700 | 1.04582200  | 0.32721000  |
| C | -3.07796100 | -2.40684700 | -0.57701100 |
| C | -5.34828600 | -1.53531100 | -0.53347000 |
| C | -5.60423500 | 1.07608000  | 0.19332500  |
| C | -3.53454500 | 2.23176600  | 0.73819700  |
| C | -3.56441100 | -3.63489800 | -0.98171600 |
| H | -2.01573500 | -2.26682200 | -0.43913800 |
| C | -5.82515100 | -2.79299300 | -0.94470000 |
| C | -6.31902900 | 2.25734300  | 0.46128000  |
| H | -2.45978200 | 2.22994900  | 0.84841400  |
| C | -4.25316800 | 3.38290000  | 0.99721900  |
| C | -4.94479100 | -3.83691700 | -1.16742800 |
| H | -2.86811500 | -4.44746200 | -1.15649100 |
| H | -6.89183500 | -2.93332500 | -1.08574900 |
| C | -5.65364500 | 3.40339100  | 0.85917800  |
| H | -7.39853900 | 2.25807700  | 0.35229900  |
| H | -3.72516800 | 4.27678700  | 1.31003700  |
| H | -5.32027900 | -4.80324200 | -1.48450400 |
| H | -6.21200800 | 4.30990600  | 1.06353500  |
| S | -6.55140400 | -0.30097900 | -0.29224300 |
| N | -3.43995400 | -0.09707800 | 0.07082800  |
| F | 2.58738800  | 0.39502000  | 2.25221400  |

Hydride adduct of (10-Phenylphenothiazinyl)dimesitylborane (**3-H**)

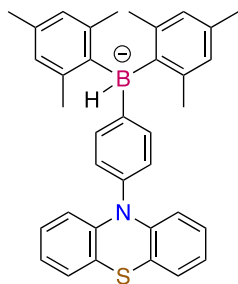

|   |             |            |            |
|---|-------------|------------|------------|
| C | -4.07722100 | 3.35334700 | 1.26055500 |
| C | -3.41162300 | 2.14623500 | 1.52008800 |
| C | -3.22062900 | 1.16864300 | 0.50468400 |

|   |             |             |             |
|---|-------------|-------------|-------------|
| C | -3.69674000 | 1.51144600  | -0.78669800 |
| C | -4.36059900 | 2.72831500  | -1.02192500 |
| C | -4.57654100 | 3.66385600  | -0.00838900 |
| B | -2.42684700 | -0.22754400 | 0.86204600  |
| C | -3.00770200 | -1.56349000 | 0.08913800  |
| C | -4.34260700 | -1.96165100 | 0.39721300  |
| C | -2.31520400 | -2.39313700 | -0.83426700 |
| C | -4.92402700 | -3.10319700 | -0.17255900 |
| C | -2.92328600 | -3.53526600 | -1.38613800 |
| C | -4.22760000 | -3.91741000 | -1.06988200 |
| C | -0.81846300 | 0.03613200  | 0.80058400  |
| C | 0.07658700  | -0.71036400 | 1.58849800  |
| C | -0.21080400 | 1.01578600  | -0.00286200 |
| C | 1.46281500  | -0.53706900 | 1.55890600  |
| H | -0.32474800 | -1.47856600 | 2.24832100  |
| C | 1.17257000  | 1.21711300  | -0.05951300 |
| H | -0.83952900 | 1.64544200  | -0.62888900 |
| C | 2.03627600  | 0.43431800  | 0.72186800  |
| H | 2.09189400  | -1.16082700 | 2.18323600  |
| H | 1.57263300  | 1.97933400  | -0.71810300 |
| C | 3.99532900  | 1.38294100  | -0.40672500 |
| C | 4.29296700  | -0.44129400 | 1.12007500  |
| C | 4.03429100  | 2.77912300  | -0.36642700 |
| C | 4.48403900  | 0.71140900  | -1.53805300 |
| C | 4.81537500  | -1.34135200 | 0.17805600  |
| C | 4.59567700  | -0.61171200 | 2.47349400  |
| C | 4.50616700  | 3.50236200  | -1.46319000 |
| H | 3.66783400  | 3.28352100  | 0.52166000  |
| C | 4.97810400  | 1.43233600  | -2.63098300 |
| C | 5.60177700  | -2.42229900 | 0.59179100  |
| H | 4.20342400  | 0.10453800  | 3.18795600  |
| C | 5.36246100  | -1.70067900 | 2.89230800  |
| C | 4.97088500  | 2.82801200  | -2.59779700 |
| H | 4.51636300  | 4.58703900  | -1.43074200 |
| H | 5.36702800  | 0.90407100  | -3.49578800 |
| C | 5.85764500  | -2.61002800 | 1.95140800  |
| H | 6.01238600  | -3.10524700 | -0.14521400 |
| H | 5.57723400  | -1.83576900 | 3.94744200  |
| H | 5.34631400  | 3.38645600  | -3.44941700 |
| H | 6.46072100  | -3.45359900 | 2.27195400  |
| S | 4.47538500  | -1.07337900 | -1.55348600 |
| N | 3.45842200  | 0.63855600  | 0.69017500  |
| C | -0.90876000 | -2.09796900 | -1.32104400 |
| C | -5.20618700 | -1.15445300 | 1.34329600  |
| C | -4.85069700 | -5.16602500 | -1.65004700 |
| C | -3.50317200 | 0.59898300  | -1.98073200 |
| C | -2.89180600 | 1.93105400  | 2.92599100  |
| C | -5.32511500 | 4.95126300  | -0.26640500 |
| H | -5.94957000 | -3.36109900 | 0.09072800  |
| H | -2.35802600 | -4.13772200 | -2.09661100 |
| H | -4.20204200 | 4.07351000  | 2.06882300  |

|   |             |             |             |
|---|-------------|-------------|-------------|
| H | -4.70848000 | 2.95256100  | -2.02993000 |
| H | -5.29909400 | 5.22081000  | -1.32728800 |
| H | -4.90099600 | 5.78338700  | 0.30626200  |
| H | -6.38105800 | 4.86697900  | 0.02263600  |
| H | -3.01787700 | 2.83667300  | 3.52925000  |
| H | -3.41475500 | 1.10810200  | 3.42587800  |
| H | -1.83132100 | 1.66069400  | 2.92031300  |
| H | -3.73264400 | 1.12965000  | -2.91112100 |
| H | -2.47594900 | 0.23227800  | -2.04184900 |
| H | -4.14391800 | -0.28659700 | -1.92561200 |
| H | -5.40054700 | -0.15182400 | 0.94920200  |
| H | -6.16695600 | -1.65115300 | 1.51479300  |
| H | -5.91531500 | -5.02063000 | -1.86414000 |
| H | -4.77513000 | -6.01339600 | -0.95574500 |
| H | -4.35488900 | -5.46266700 | -2.58013900 |
| H | -4.70763800 | -1.00544700 | 2.30676700  |
| H | -0.80501400 | -1.07009100 | -1.67657000 |
| H | -0.16223700 | -2.21708900 | -0.53097800 |
| H | -0.64406600 | -2.77151200 | -2.14313400 |
| H | -2.65000900 | -0.48159700 | 2.04447500  |

Hydride adduct of (10-Phenylphenothiazinyl)dimesitylborane radical cation ( $3^{\bullet+}\text{-H}$ )

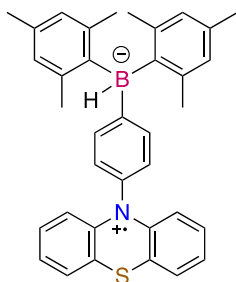

|   |             |             |             |
|---|-------------|-------------|-------------|
| C | -5.36916600 | -2.40937300 | -1.19901100 |
| C | -4.60405800 | -1.23522800 | -1.20429700 |
| C | -3.27245700 | -1.20558300 | -0.69375900 |
| C | -2.77938400 | -2.43444800 | -0.17925500 |
| C | -3.56968300 | -3.59809000 | -0.19246700 |
| C | -4.86895900 | -3.61552400 | -0.70007900 |
| H | -6.38459100 | -2.37937000 | -1.59256800 |
| H | -3.15591800 | -4.51696600 | 0.22125600  |
| B | -2.47571800 | 0.23167500  | -0.79046500 |
| C | -3.11275500 | 1.44821500  | 0.11254100  |
| C | -3.07908300 | 2.77954900  | -0.38680400 |
| C | -3.66229900 | 1.28104700  | 1.40928000  |
| C | -3.60644400 | 3.85088900  | 0.34878500  |
| C | -4.18398300 | 2.37160100  | 2.12646900  |
| C | -4.18052200 | 3.66889800  | 1.61080700  |
| H | -3.56182100 | 4.85485500  | -0.07194300 |
| H | -4.59590200 | 2.19999100  | 3.12028700  |
| C | -5.26200400 | 0.00987900  | -1.75979900 |
| H | -5.34649400 | 0.79099200  | -0.99776500 |



|   |             |             |             |
|---|-------------|-------------|-------------|
| H | -4.66888500 | 0.44514400  | -2.57116800 |
| H | -6.26425000 | -0.21465100 | -2.13861800 |
| C | -1.40582500 | -2.58298100 | 0.44931300  |
| H | -1.19931000 | -1.79798900 | 1.18006900  |
| H | -1.32529000 | -3.54876100 | 0.95871900  |
| H | -0.60316500 | -2.52903500 | -0.29248500 |
| C | -5.69208900 | -4.88231600 | -0.72950400 |
| H | -6.74030600 | -4.68529200 | -0.47914500 |
| H | -5.68103300 | -5.34496400 | -1.72504800 |
| H | -5.30721300 | -5.62285200 | -0.02108200 |
| C | -2.45926600 | 3.10254400  | -1.73056900 |
| H | -3.02199300 | 2.64780300  | -2.55311800 |
| H | -2.42701800 | 4.18522400  | -1.89197000 |
| H | -1.43923500 | 2.71203800  | -1.80497300 |
| C | -3.70338200 | -0.06842900 | 2.09676000  |
| H | -4.43457000 | -0.73909400 | 1.63542400  |
| H | -2.73872300 | -0.57837700 | 2.03984000  |
| H | -3.96501000 | 0.04699100  | 3.15384400  |
| C | -4.78052500 | 4.82543100  | 2.37626500  |
| H | -4.81028500 | 4.61891600  | 3.45096400  |
| H | -4.20933700 | 5.74729800  | 2.22216000  |
| H | -5.81058300 | 5.02697000  | 2.05435200  |
| C | -0.86027200 | 0.18867200  | -0.58016500 |
| C | -0.21437200 | 0.67353800  | 0.57442000  |
| C | -0.01977800 | -0.32073800 | -1.59195800 |
| C | 1.16967100  | 0.60952500  | 0.74544100  |
| H | -0.81643400 | 1.10138000  | 1.37124300  |
| C | 1.36550700  | -0.39907800 | -1.45449600 |
| H | -0.47232000 | -0.68271200 | -2.51216700 |
| C | 1.94551200  | 0.06004400  | -0.27240200 |
| H | 1.64478900  | 0.97017900  | 1.65333800  |
| H | 1.99168200  | -0.81119900 | -2.24060300 |
| C | 3.87080000  | -1.22348700 | 0.46510400  |
| C | 4.16469100  | 1.03249500  | -0.49751600 |
| C | 2.96413500  | -2.24648700 | 0.83661700  |
| C | 5.25642100  | -1.44787800 | 0.68444300  |
| C | 5.57977700  | 1.04024100  | -0.37135700 |
| C | 3.53980000  | 2.17405100  | -1.05582100 |
| C | 3.41931500  | -3.42659700 | 1.39224400  |
| H | 1.90562900  | -2.09661800 | 0.68126800  |
| C | 5.70110000  | -2.65590900 | 1.25096500  |
| C | 6.32525300  | 2.15712500  | -0.78920700 |
| H | 2.46468400  | 2.18709100  | -1.16225200 |
| C | 4.28839800  | 3.26201100  | -1.46159500 |
| C | 4.79435900  | -3.63993900 | 1.60304000  |
| H | 2.70241800  | -4.19235500 | 1.66674900  |
| H | 6.76408700  | -2.80543100 | 1.40879400  |
| C | 5.68964100  | 3.26095100  | -1.32972300 |
| H | 7.40486700  | 2.14149400  | -0.68255500 |
| H | 3.78365900  | 4.12295700  | -1.88551200 |
| H | 5.14535000  | -4.56829600 | 2.03927000  |

|   |             |             |             |
|---|-------------|-------------|-------------|
| H | 6.27166700  | 4.11797200  | -1.64921300 |
| S | 6.49151600  | -0.28777100 | 0.28703200  |
| N | 3.38430200  | -0.04643700 | -0.09583500 |
| H | -2.60335300 | 0.53996500  | -1.97101300 |

*Ammonia adduct of (10-Phenylphenothiazinyl)dimesitylborane (3-NH<sub>3</sub>)*

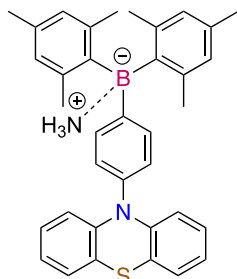

|   |             |             |             |
|---|-------------|-------------|-------------|
| C | -5.28562600 | 2.49661900  | 1.03743300  |
| C | -4.57674200 | 1.28663100  | 1.01974500  |
| C | -3.23064400 | 1.21956100  | 0.55835000  |
| C | -2.68063000 | 2.43357800  | 0.05732300  |
| C | -3.41952400 | 3.62614400  | 0.09416500  |
| C | -4.71897600 | 3.69198500  | 0.59871900  |
| H | -6.31582800 | 2.49586600  | 1.38922700  |
| H | -2.96564900 | 4.53204100  | -0.30282100 |
| B | -2.42150700 | -0.21669600 | 0.65661700  |
| C | -3.03905000 | -1.46409700 | -0.21797500 |
| C | -2.83163100 | -2.81817600 | 0.16710000  |
| C | -3.73540800 | -1.26200000 | -1.44237600 |
| C | -3.39440300 | -3.87691700 | -0.56156800 |
| C | -4.27853500 | -2.34462300 | -2.15012400 |
| C | -4.15079400 | -3.66404800 | -1.71368900 |
| H | -3.21526500 | -4.89721200 | -0.22748700 |
| H | -4.80731700 | -2.14725000 | -3.08063100 |
| C | -5.37109600 | 0.07223200  | 1.47816800  |
| H | -5.03798700 | -0.85083700 | 1.00146700  |
| H | -5.33305500 | -0.06075100 | 2.56786500  |
| H | -6.42796200 | 0.20348000  | 1.22882100  |
| C | -1.32032700 | 2.54325600  | -0.60732200 |
| H | -1.14266900 | 1.73901400  | -1.32337500 |
| H | -1.24784800 | 3.49327000  | -1.14447900 |
| H | -0.49841700 | 2.50415300  | 0.11168800  |
| C | -5.47523800 | 4.99676300  | 0.66225500  |
| H | -6.55577800 | 4.83466500  | 0.59944700  |
| H | -5.27793300 | 5.52110000  | 1.60590800  |
| H | -5.18056200 | 5.66850400  | -0.15008900 |
| C | -1.95804400 | -3.23002600 | 1.34110400  |
| H | -2.48938800 | -3.20496200 | 2.30046900  |
| H | -1.62014100 | -4.26128000 | 1.20904700  |
| H | -1.06291800 | -2.60764500 | 1.42218100  |
| C | -3.90647200 | 0.09814800  | -2.09198300 |
| H | -4.66252000 | 0.70796200  | -1.59028300 |

|   |             |             |             |
|---|-------------|-------------|-------------|
| H | -2.97970400 | 0.67477400  | -2.08159200 |
| H | -4.21205700 | -0.02606400 | -3.13520300 |
| C | -4.78788700 | -4.80864500 | -2.46376800 |
| H | -4.84962000 | -4.59744600 | -3.53594900 |
| H | -4.22442000 | -5.73708700 | -2.32824600 |
| H | -5.80996600 | -4.99240300 | -2.10891200 |
| C | -0.80357500 | -0.16285100 | 0.48020800  |
| C | -0.17779500 | -0.68214100 | -0.66589200 |
| C | 0.04496800  | 0.39047400  | 1.45877600  |
| C | 1.20566400  | -0.62692700 | -0.84842300 |
| H | -0.78957100 | -1.13527500 | -1.44018700 |
| C | 1.42988800  | 0.44465500  | 1.30135500  |
| H | -0.37499000 | 0.82704400  | 2.36221600  |
| C | 2.01310100  | -0.05907900 | 0.13592900  |
| H | 1.66803700  | -1.02228200 | -1.74806200 |
| H | 2.05888400  | 0.88636200  | 2.06856700  |
| C | 3.98248300  | 1.23180000  | -0.51327200 |
| C | 4.23997300  | -0.97281700 | 0.56601200  |
| C | 3.21035300  | 2.40556300  | -0.54984800 |
| C | 5.32042000  | 1.30753300  | -0.95005000 |
| C | 5.60305300  | -1.10924500 | 0.23394600  |
| C | 3.70636600  | -1.84477200 | 1.53034000  |
| C | 3.75795500  | 3.61075900  | -0.99404200 |
| H | 2.17438500  | 2.37494300  | -0.24033400 |
| C | 5.87404600  | 2.52421800  | -1.35432300 |
| C | 6.40807200  | -2.04681400 | 0.88432400  |
| H | 2.65884800  | -1.77652700 | 1.79188600  |
| C | 4.50734300  | -2.80746900 | 2.14809600  |
| C | 5.09452300  | 3.68275700  | -1.38826500 |
| H | 3.13032900  | 4.49606100  | -1.01942900 |
| H | 6.91348600  | 2.55236100  | -1.66655000 |
| C | 5.86433500  | -2.90892000 | 1.83943200  |
| H | 7.45867500  | -2.11383500 | 0.61876100  |
| H | 4.06102000  | -3.47198300 | 2.88129800  |
| H | 5.52666000  | 4.62021000  | -1.72211900 |
| H | 6.49217700  | -3.64763600 | 2.32637900  |
| S | 6.28259100  | -0.17965100 | -1.12296300 |
| N | 3.43632900  | 0.00132300  | -0.07347200 |
| N | -2.61071100 | -0.56841900 | 2.29699800  |
| H | -2.66834300 | 0.30048500  | 2.82695200  |
| H | -3.46663100 | -1.08359500 | 2.49098000  |
| H | -1.84008300 | -1.10930700 | 2.68306100  |

Ammonia adduct of (10-Phenylphenothiazinyl)dimesitylborane radical cation ( $3^{•+}$ -NH<sub>3</sub>)

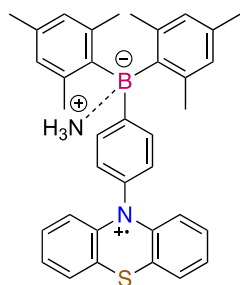

|   |            |             |             |
|---|------------|-------------|-------------|
| C | 5.32153600 | 2.45439500  | -1.01283100 |
| C | 4.59571700 | 1.25466700  | -1.00853100 |
| C | 3.23474200 | 1.21077200  | -0.58911200 |
| C | 2.68592800 | 2.43680500  | -0.11759800 |
| C | 3.44276600 | 3.61842400  | -0.13955400 |
| C | 4.75875900 | 3.66130500  | -0.60150800 |
| H | 6.36204100 | 2.43620300  | -1.33186700 |
| H | 2.98941400 | 4.53415900  | 0.23446300  |
| B | 2.41475800 | -0.21735300 | -0.70191100 |
| C | 2.98970200 | -1.46691900 | 0.19783300  |
| C | 2.77213900 | -2.82066300 | -0.18276500 |
| C | 3.65176500 | -1.26449600 | 1.44114900  |
| C | 3.29485000 | -3.88160800 | 0.57178800  |
| C | 4.15489000 | -2.34959700 | 2.17408200  |
| C | 4.01880400 | -3.67056500 | 1.74493800  |
| H | 3.11053800 | -4.90177200 | 0.24047300  |
| H | 4.65860400 | -2.15269400 | 3.11835400  |
| C | 5.38701600 | 0.02668200  | -1.43431400 |
| H | 5.02795100 | -0.88918000 | -0.96270700 |
| H | 5.38082000 | -0.11211600 | -2.52387900 |
| H | 6.43731500 | 0.14551900  | -1.15355800 |
| C | 1.30537800 | 2.57375400  | 0.49937900  |
| H | 1.09849400 | 1.78990500  | 1.23047500  |
| H | 1.22419300 | 3.53664400  | 1.01136900  |
| H | 0.50706200 | 2.52720100  | -0.24549400 |
| C | 5.53597700 | 4.95412900  | -0.65070500 |
| H | 6.60944000 | 4.77871800  | -0.52997400 |
| H | 5.39451600 | 5.46185600  | -1.61319600 |
| H | 5.21006600 | 5.64541600  | 0.13262900  |
| C | 1.92985700 | -3.22970800 | -1.38039400 |
| H | 2.49000300 | -3.21557600 | -2.32332300 |
| H | 1.57742700 | -4.25662500 | -1.25335500 |
| H | 1.04299100 | -2.59997700 | -1.49281300 |
| C | 3.82649000 | 0.09821500  | 2.08445700  |
| H | 4.60747700 | 0.69065900  | 1.60061100  |
| H | 2.91089700 | 0.69124700  | 2.04242200  |
| H | 4.09911200 | -0.02223000 | 3.13706600  |
| C | 4.61425800 | -4.81843400 | 2.52335400  |
| H | 4.64884800 | -4.59812200 | 3.59483300  |
| H | 4.03958700 | -5.73865700 | 2.37959300  |

|   |             |             |             |
|---|-------------|-------------|-------------|
| H | 5.64276500  | -5.02196800 | 2.19951700  |
| C | 0.79238700  | -0.14542000 | -0.55404900 |
| C | 0.15413500  | -0.62771100 | 0.60324500  |
| C | -0.04036100 | 0.38286400  | -1.55837600 |
| C | -1.22728000 | -0.55761800 | 0.77681500  |
| H | 0.75596400  | -1.06225900 | 1.39480300  |
| C | -1.42720700 | 0.45383300  | -1.41951100 |
| H | 0.38990800  | 0.78744600  | -2.47061100 |
| C | -2.00447400 | -0.01058100 | -0.24131100 |
| H | -1.69945800 | -0.92014200 | 1.68448100  |
| H | -2.05090000 | 0.87518000  | -2.20145000 |
| C | -3.93795000 | 1.25526700  | 0.50358000  |
| C | -4.21295000 | -0.99917900 | -0.47605500 |
| C | -3.04121300 | 2.28097200  | 0.88872400  |
| C | -5.32634300 | 1.46722800  | 0.71790400  |
| C | -5.62840400 | -1.01531100 | -0.35562400 |
| C | -3.57937600 | -2.13477700 | -1.03534100 |
| C | -3.50794700 | 3.45240100  | 1.45348300  |
| H | -1.98031400 | 2.14390200  | 0.73928800  |
| C | -5.78284900 | 2.66678100  | 1.29376600  |
| C | -6.36602400 | -2.13500500 | -0.78092100 |
| H | -2.50397700 | -2.14575500 | -1.13823500 |
| C | -4.32041000 | -3.22562300 | -1.44791200 |
| C | -4.88548600 | 3.65390300  | 1.65947700  |
| H | -2.79808800 | 4.22060200  | 1.73903600  |
| H | -6.84761400 | 2.80685900  | 1.44764400  |
| C | -5.72221000 | -3.23301800 | -1.32256900 |
| H | -7.44603900 | -2.12566700 | -0.67857700 |
| H | -3.80903300 | -4.08254700 | -1.87193000 |
| H | -5.24519500 | 4.57540200  | 2.10284400  |
| H | -6.29776000 | -4.09225400 | -1.64747600 |
| S | -6.55093500 | 0.30358000  | 0.30332500  |
| N | -3.44309100 | 0.08547200  | -0.06670700 |
| N | 2.63845800  | -0.57778100 | -2.33103900 |
| H | 2.70472500  | 0.28658200  | -2.86773700 |
| H | 3.50495200  | -1.08572100 | -2.49654700 |
| H | 1.88717900  | -1.13156400 | -2.73656700 |

#### FIA reference system – COF<sub>2</sub>

##### COF<sub>2</sub>

|   |            |             |             |
|---|------------|-------------|-------------|
| C | 0.00000000 | 0.00000000  | 0.14193800  |
| O | 0.00000000 | 0.00000000  | 1.32362300  |
| F | 0.00000000 | 1.07077100  | -0.63559000 |
| F | 0.00000000 | -1.07077100 | -0.63559000 |

##### COF<sub>3</sub><sup>-</sup>

|   |             |             |             |
|---|-------------|-------------|-------------|
| C | -0.00043800 | -0.00080900 | 0.18703200  |
| F | 0.81509500  | -0.98466300 | -0.46288100 |
| F | 0.44863200  | 1.20009900  | -0.45449800 |

|   |             |             |             |
|---|-------------|-------------|-------------|
| F | -1.26058000 | -0.20956500 | -0.46430100 |
| O | -0.00321300 | -0.00599800 | 1.41411600  |

### HIA reference system – Me<sub>3</sub>SiH

#### Me<sub>3</sub>SiH

|    |             |             |             |
|----|-------------|-------------|-------------|
| Si | 0.00003700  | -0.00002600 | 0.37851100  |
| H  | 0.00000400  | -0.00008800 | 1.87466800  |
| C  | 1.78840000  | -0.07510600 | -0.22289700 |
| H  | 1.82481900  | -0.07687200 | -1.31861300 |
| H  | 2.36158600  | 0.78841500  | 0.13246900  |
| H  | 2.28726500  | -0.98340800 | 0.13290200  |
| C  | -0.95927900 | -1.51105100 | -0.22301700 |
| H  | -0.49823600 | -2.43929400 | 0.13231100  |
| H  | -1.99535200 | -1.48873700 | 0.13269700  |
| H  | -0.97894800 | -1.54155700 | -1.31871700 |
| C  | -0.82915600 | 1.58619400  | -0.22297700 |
| H  | -1.86343900 | 1.65091800  | 0.13276200  |
| H  | -0.29181200 | 2.47243300  | 0.13240500  |
| H  | -0.84620400 | 1.61832600  | -1.31870000 |

#### Me<sub>3</sub>Si<sup>+</sup>

|    |             |             |             |
|----|-------------|-------------|-------------|
| Si | 0.00000000  | -0.00017000 | 0.00000000  |
| C  | -1.62246100 | -0.86844700 | 0.00000000  |
| H  | -2.19877300 | -0.55558800 | 0.88038400  |
| H  | -1.51473100 | -1.95490300 | 0.00000000  |
| H  | -2.19877300 | -0.55558800 | -0.88038400 |
| C  | 0.05888200  | 1.83894200  | 0.00000000  |
| C  | 1.56364100  | -0.97029100 | 0.00000000  |
| H  | 0.61756200  | 2.18184700  | 0.88045300  |
| H  | 1.58143200  | -1.62554800 | 0.88043000  |
| H  | 0.61756200  | 2.18184700  | -0.88045300 |
| H  | 1.58143200  | -1.62554800 | -0.88043000 |
| H  | -0.93631100 | 2.28784800  | 0.00000000  |
| H  | 2.45022600  | -0.33320900 | 0.00000000  |

### AA reference system – NH<sub>3</sub>

#### NH<sub>3</sub>

|   |             |             |             |
|---|-------------|-------------|-------------|
| N | 0.00000000  | 0.00000000  | 0.11362800  |
| H | 0.00000000  | 0.94419800  | -0.26513200 |
| H | -0.81770000 | -0.47209900 | -0.26513200 |
| H | 0.81770000  | -0.47209900 | -0.26513200 |

## S8.2 Optimized Coordinates for Mechanistic Investigation

### Lewis Acid Mediated Pathway:

#### 4-Bromobenzene

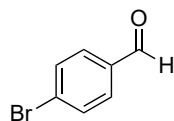

|    |             |             |             |
|----|-------------|-------------|-------------|
| C  | -0.05001100 | 1.29522200  | 0.00003900  |
| C  | 1.34232400  | 1.36996900  | 0.00024100  |
| C  | 2.11787300  | 0.20064000  | 0.00031400  |
| C  | 1.48779300  | -1.05579400 | 0.00018600  |
| C  | 0.10016900  | -1.14371400 | -0.00001700 |
| C  | -0.65241500 | 0.03649500  | -0.00007900 |
| H  | -0.65212600 | 2.19635300  | -0.00002200 |
| H  | 1.82743500  | 2.34226200  | 0.00034200  |
| H  | 2.09355000  | -1.95603400 | 0.00024600  |
| H  | -0.39237700 | -2.10925900 | -0.00012300 |
| C  | 3.58810600  | 0.31624000  | 0.00054300  |
| H  | 3.97764700  | 1.35250200  | 0.00061800  |
| O  | 4.36393000  | -0.63215400 | 0.00062500  |
| Br | -2.55338900 | -0.08237000 | -0.00038300 |

#### 4-Bromo((triethylsiloxy)methyl)benzene cation

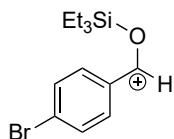

|    |             |             |             |
|----|-------------|-------------|-------------|
| C  | 2.92922300  | -1.31877700 | -0.55840400 |
| C  | 1.55705400  | -1.49515800 | -0.65347100 |
| C  | 0.67905400  | -0.46584600 | -0.24134300 |
| C  | 1.19667700  | 0.74922200  | 0.26983100  |
| C  | 2.56472000  | 0.92674700  | 0.36552600  |
| C  | 3.41811700  | -0.10965800 | -0.04951800 |
| H  | 3.61003500  | -2.10078800 | -0.87169600 |
| H  | 1.15725200  | -2.42475800 | -1.04606000 |
| H  | 0.51850900  | 1.53450500  | 0.58392300  |
| H  | 2.97605800  | 1.85038000  | 0.75452700  |
| C  | -0.72075900 | -0.69400000 | -0.35894000 |
| H  | -1.06649900 | -1.65025900 | -0.75984400 |
| O  | -1.58186700 | 0.17453800  | -0.01490600 |
| Br | 5.28592800  | 0.13984500  | 0.08437100  |
| Si | -3.39050100 | 0.14670600  | -0.08307600 |
| C  | -3.85146600 | 0.46314900  | 1.70884900  |
| H  | -4.94118000 | 0.60636500  | 1.72711000  |
| H  | -3.42231500 | 1.43015200  | 2.00038100  |
| C  | -3.44462600 | -0.62604400 | 2.71996500  |
| H  | -2.35814700 | -0.75709500 | 2.75723200  |

|   |             |             |             |
|---|-------------|-------------|-------------|
| H | -3.77659800 | -0.35854200 | 3.72862000  |
| H | -3.88935700 | -1.59582600 | 2.47434000  |
| C | -3.85715500 | -1.54756100 | -0.75145300 |
| H | -3.41182700 | -1.66931300 | -1.74734400 |
| H | -3.41324100 | -2.32306400 | -0.11408600 |
| C | -5.38364100 | -1.77466800 | -0.84377900 |
| H | -5.59690700 | -2.77230600 | -1.24054400 |
| H | -5.86542900 | -1.70099500 | 0.13656100  |
| H | -5.86275600 | -1.04769100 | -1.50743800 |
| C | -3.76989800 | 1.56335300  | -1.25432900 |
| H | -3.34820500 | 1.30337400  | -2.23409800 |
| H | -4.86029100 | 1.56889100  | -1.39203100 |
| C | -3.28923200 | 2.96100500  | -0.81777300 |
| H | -2.20163500 | 2.99394300  | -0.69760700 |
| H | -3.56168800 | 3.71265700  | -1.56605200 |
| H | -3.73972100 | 3.26503500  | 0.13246500  |

4-Bromo((triethylsiloxy)methyl)benzene

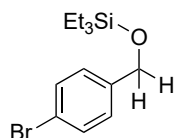

|    |             |             |             |
|----|-------------|-------------|-------------|
| C  | -3.02465500 | -1.38896300 | -0.30881400 |
| C  | -1.65559800 | -1.63759200 | -0.40908800 |
| C  | -0.71632100 | -0.62040900 | -0.18323700 |
| C  | -1.17383500 | 0.66023200  | 0.14056900  |
| C  | -2.54351200 | 0.92865700  | 0.24291600  |
| C  | -3.45259500 | -0.10098700 | 0.01666400  |
| H  | -3.74172900 | -2.18319600 | -0.48429400 |
| H  | -1.31965600 | -2.63937800 | -0.66599100 |
| H  | -0.45434200 | 1.45260300  | 0.31247300  |
| H  | -2.88825900 | 1.92569800  | 0.49442800  |
| C  | 0.76147500  | -0.94111000 | -0.29496500 |
| H  | 1.01941600  | -1.68731200 | 0.47158500  |
| O  | 1.55399400  | 0.22417400  | -0.14988400 |
| Br | -5.33127000 | 0.25343600  | 0.15752900  |
| Si | 3.23476300  | 0.25901600  | 0.07640500  |
| C  | 4.12938200  | -0.67789700 | -1.31177700 |
| H  | 5.17071600  | -0.32378000 | -1.30990800 |
| H  | 3.71023600  | -0.34178600 | -2.27029100 |
| C  | 4.11715800  | -2.21848800 | -1.24782600 |
| H  | 3.10140500  | -2.62318400 | -1.30853700 |
| H  | 4.68929300  | -2.65464800 | -2.07511900 |
| H  | 4.55951400  | -2.58735400 | -0.31600300 |
| C  | 3.63500300  | -0.47921800 | 1.77681000  |
| H  | 3.05634800  | 0.08126500  | 2.52415000  |
| H  | 3.25284600  | -1.50861500 | 1.81524200  |
| C  | 5.12869400  | -0.47194200 | 2.16163200  |
| H  | 5.28759300  | -0.91142300 | 3.15319600  |
| H  | 5.73329300  | -1.04607900 | 1.45049000  |



|   |            |             |             |
|---|------------|-------------|-------------|
| H | 5.53361200 | 0.54585900  | 2.18775800  |
| C | 3.65726900 | 2.09972400  | 0.02375800  |
| H | 3.09655600 | 2.59007800  | 0.83186100  |
| H | 4.71806300 | 2.20795200  | 0.28986500  |
| C | 3.38227300 | 2.81644300  | -1.31240100 |
| H | 2.32522200 | 2.75017400  | -1.59139300 |
| H | 3.64192100 | 3.88015100  | -1.25593100 |
| H | 3.96659700 | 2.38141400  | -2.13095200 |
| H | 0.94875800 | -1.40900800 | -1.27217100 |

*Triethylsilane*

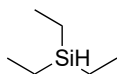

|    |             |             |             |
|----|-------------|-------------|-------------|
| Si | 0.02286100  | -0.26131800 | 0.73338400  |
| H  | 0.45027700  | -0.68690300 | 2.10668400  |
| C  | -1.78259200 | -0.83010800 | 0.53420400  |
| H  | -1.81302700 | -1.88693800 | 0.83557300  |
| H  | -2.38591400 | -0.29374000 | 1.28010800  |
| C  | 1.15017700  | -1.13540900 | -0.52331800 |
| H  | 0.84645900  | -0.83859600 | -1.53656500 |
| H  | 0.94874800  | -2.21377700 | -0.45680500 |
| C  | 0.23922400  | 1.62951700  | 0.67221200  |
| H  | -0.45859200 | 2.06727900  | 1.39989600  |
| H  | 1.24348500  | 1.84946100  | 1.06088800  |
| C  | -2.42132400 | -0.67836800 | -0.85996700 |
| H  | -1.85192900 | -1.21680000 | -1.62593700 |
| H  | -3.44347100 | -1.07538600 | -0.87485400 |
| H  | -2.47619000 | 0.37051500  | -1.17006500 |
| C  | 2.65692800  | -0.87495600 | -0.33523400 |
| H  | 3.25546100  | -1.42037500 | -1.07473000 |
| H  | 2.89895700  | 0.18871600  | -0.44090100 |
| H  | 2.99656400  | -1.19014300 | 0.65828800  |
| C  | 0.06111100  | 2.31109600  | -0.69819300 |
| H  | 0.24938500  | 3.38955300  | -0.63427500 |
| H  | 0.75247500  | 1.90379200  | -1.44466800 |
| H  | -0.95387800 | 2.18118000  | -1.08823600 |

**Hydrogen Atom Transfer (HAT) Mediated Pathway:**

*Triethylsilyl radical*

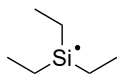

|    |             |             |             |
|----|-------------|-------------|-------------|
| Si | -0.01204400 | -0.23930400 | -0.77917500 |
| C  | 1.81226300  | -0.77676700 | -0.58158700 |
| H  | 1.88988100  | -1.80617600 | -0.95687300 |
| H  | 2.41574500  | -0.16398100 | -1.26455000 |
| C  | -1.13913200 | -1.18200400 | 0.44126200  |
| H  | -0.84574200 | -0.89864300 | 1.46379400  |
| H  | -0.90850800 | -2.25183700 | 0.35029700  |

|   |             |             |             |
|---|-------------|-------------|-------------|
| C | -0.26730700 | 1.65309800  | -0.66567100 |
| H | 0.44361900  | 2.12479700  | -1.35717600 |
| H | -1.26463500 | 1.87672600  | -1.06721200 |
| C | 2.40294100  | -0.70932100 | 0.84412400  |
| H | 1.83334800  | -1.32814700 | 1.54594200  |
| H | 3.43966900  | -1.06867600 | 0.85751300  |
| H | 2.40640900  | 0.31368600  | 1.23417800  |
| C | -2.64993600 | -0.95257100 | 0.25396500  |
| H | -3.23526300 | -1.51791600 | 0.98903300  |
| H | -2.91498200 | 0.10451700  | 0.36938000  |
| H | -2.98098800 | -1.26565400 | -0.74287100 |
| C | -0.12945100 | 2.28177700  | 0.73840500  |
| H | -0.33221300 | 3.35978200  | 0.70845400  |
| H | -0.83262100 | 1.83673500  | 1.45097000  |
| H | 0.87862700  | 2.14976400  | 1.14458200  |

*4-Bromo((triethylsiloxy)methyl)benzyl radical*

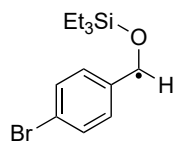

|    |             |             |             |
|----|-------------|-------------|-------------|
| C  | 2.93438600  | -1.39227700 | -0.25174700 |
| C  | 1.56449900  | -1.59434300 | -0.31292100 |
| C  | 0.64860800  | -0.50645900 | -0.18928900 |
| C  | 1.19195000  | 0.79974200  | -0.00231700 |
| C  | 2.56483000  | 1.00065000  | 0.05802000  |
| C  | 3.42995300  | -0.09292600 | -0.06753600 |
| H  | 3.61499600  | -2.23140200 | -0.34698300 |
| H  | 1.18037900  | -2.60063900 | -0.45668500 |
| H  | 0.51904500  | 1.64468700  | 0.09367500  |
| H  | 2.96278700  | 1.99978500  | 0.20067300  |
| C  | -0.73932200 | -0.74469000 | -0.25929800 |
| H  | -1.12692700 | -1.74912000 | -0.40944300 |
| O  | -1.61803100 | 0.27279600  | -0.16106200 |
| Br | 5.32175900  | 0.18665600  | 0.01653000  |
| Si | -3.33600100 | 0.18381100  | -0.07569000 |
| C  | -3.81468400 | -0.15557100 | 1.72150300  |
| H  | -4.91197100 | -0.11210300 | 1.77855700  |
| H  | -3.45411200 | 0.68455900  | 2.32991300  |
| C  | -3.31274800 | -1.48441100 | 2.31896800  |
| H  | -2.21848500 | -1.53705500 | 2.31948800  |
| H  | -3.64557100 | -1.60326400 | 3.35644700  |
| H  | -3.68362300 | -2.34801200 | 1.75593700  |
| C  | -3.91552000 | -1.18212800 | -1.24926900 |
| H  | -3.49816000 | -0.97104900 | -2.24326800 |
| H  | -3.47642000 | -2.13839200 | -0.93545800 |
| C  | -5.44798800 | -1.33418800 | -1.34796200 |
| H  | -5.72027100 | -2.13817800 | -2.04082700 |
| H  | -5.89418400 | -1.57529500 | -0.37679600 |
| H  | -5.92341500 | -0.41616500 | -1.71021100 |

|   |             |            |             |
|---|-------------|------------|-------------|
| C | -3.90390700 | 1.88900200 | -0.64442100 |
| H | -3.61813200 | 1.99748700 | -1.69977100 |
| H | -5.00276500 | 1.89340800 | -0.63134900 |
| C | -3.36985300 | 3.08469100 | 0.16842200  |
| H | -2.27560200 | 3.12323000 | 0.15128300  |
| H | -3.73972000 | 4.03401400 | -0.23558200 |
| H | -3.68238900 | 3.03226800 | 1.21706100  |

## S9 Single Crystal X-Ray Diffraction

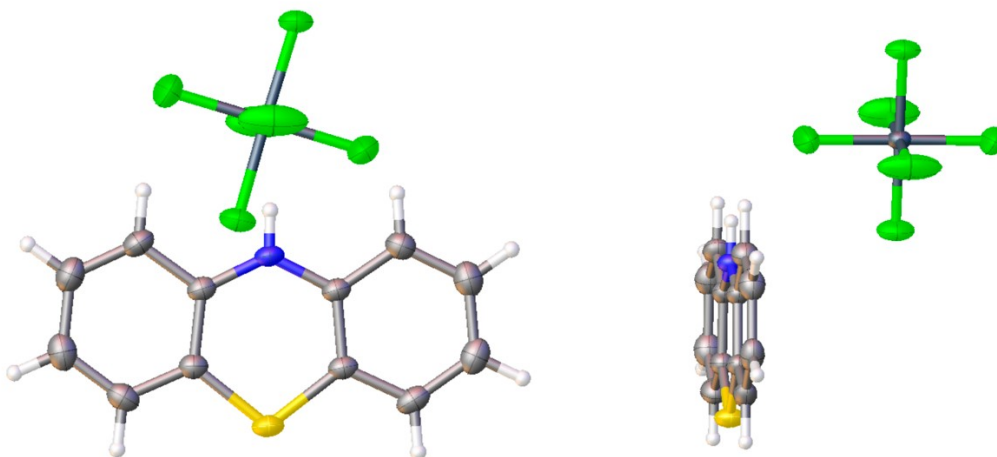

**Figure S22:** Solid state structure of **1<sup>++</sup>**; a) front view and b) side view. Thermal ellipsoids are drawn at 50% probability. N: Blue, S: Yellow, F: Green, Sb: Dark Grey, C: Light Grey.

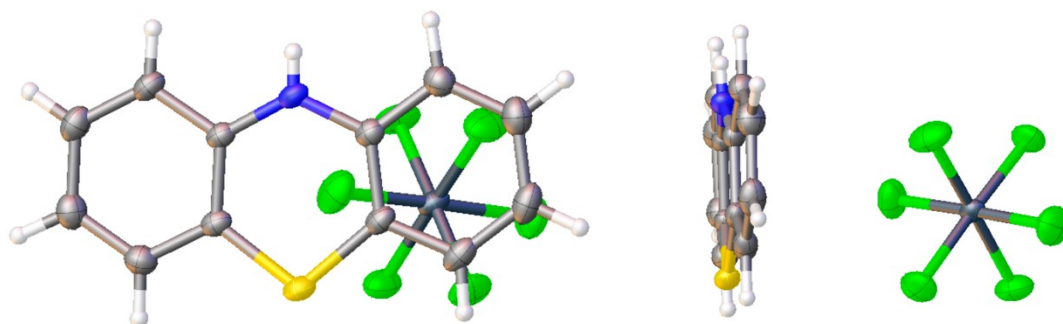

**Figure S23:** Solid state structure of **2<sup>++</sup>**; a) front view and b) side view. Thermal ellipsoids are drawn at 50% probability. N: Blue, S: Yellow, F: Green, Sb: Dark Grey, C: Light Grey.

**Table 3:** Crystal data and structure refinement for **1<sup>++</sup>** and **2<sup>++</sup>**.

| Molecule                            | <b>1<sup>++</sup></b>                              | <b>2<sup>++</sup></b>                              |
|-------------------------------------|----------------------------------------------------|----------------------------------------------------|
| Formula                             | C <sub>12</sub> H <sub>9</sub> F <sub>6</sub> NSSb | C <sub>12</sub> H <sub>9</sub> F <sub>6</sub> NSSb |
| Formula wt (g mol <sup>-1</sup> )   | 435.01                                             | 435.01                                             |
| Temperature (K)                     | 173.0                                              | 173.0                                              |
| Crystal System                      | Monoclinic                                         | Triclinic                                          |
| Space Group                         | P21/m                                              | P-1                                                |
| a/Å                                 | 8.2631(2)                                          | 8.1743(3)                                          |
| b/Å                                 | 6.6836(2)                                          | 8.4346(3)                                          |
| c/Å                                 | 13.0719(3)                                         | 10.2616(4)                                         |
| α/°                                 | 90                                                 | 90.700(2)                                          |
| β/°                                 | 96.1440(10)                                        | 104.821(2)                                         |
| γ/°                                 | 90                                                 | 93.8490(10)                                        |
| Volume/Å <sup>3</sup>               | 717.78(3)                                          | 682.11(4)                                          |
| Z                                   | 2                                                  | 2                                                  |
| ρ <sub>calc</sub> g/cm <sup>3</sup> | 2.013                                              | 2.118                                              |
| μ/mm <sup>-1</sup>                  | 2.124                                              | 2.235                                              |
| F(000)                              | 418.0                                              | 418.0                                              |

|                                                           |                                                               |                                                               |
|-----------------------------------------------------------|---------------------------------------------------------------|---------------------------------------------------------------|
| <b>Crystal size/mm<sup>3</sup></b>                        | 0.1 × 0.1 × 0.01                                              | 0.2 × 0.2 × 0.02                                              |
| <b>Radiation</b>                                          | MoK $\alpha$ ( $\lambda$ = 0.71073)                           | MoK $\alpha$ ( $\lambda$ = 0.71073)                           |
| <b>2<math>\theta</math> range for data collection/°</b>   | 4.958 to 72.926                                               | 4.108 to 72.636                                               |
| <b>Index ranges</b>                                       | -13 ≤ h ≤ 13, -11 ≤ k ≤ 11, -21 ≤ l ≤ 21                      | -13 ≤ h ≤ 13, -14 ≤ k ≤ 14, -17 ≤ l ≤ 17                      |
| <b>Reflections collected</b>                              | 40310                                                         | 62268                                                         |
| <b>Independent reflections</b>                            | 3739 [R <sub>int</sub> = 0.0525, R <sub>sigma</sub> = 0.0275] | 6606 [R <sub>int</sub> = 0.0413, R <sub>sigma</sub> = 0.0206] |
| <b>Data/restraints/parameters</b>                         | 3739/0/127                                                    | 6606/0/226                                                    |
| <b>Goodness-of-fit on F<sup>2</sup></b>                   | 1.086                                                         | 1.123                                                         |
| <b>Final R indexes [I &gt;= 2<math>\sigma</math> (I)]</b> | R <sub>1</sub> = 0.0326, wR <sub>2</sub> = 0.0613             | R <sub>1</sub> = 0.0248, wR <sub>2</sub> = 0.0487             |
| <b>Final R indexes [all data]</b>                         | R <sub>1</sub> = 0.0437, wR <sub>2</sub> = 0.0650             | R <sub>1</sub> = 0.0355, wR <sub>2</sub> = 0.0549             |
| <b>Largest diff. peak/hole / e Å<sup>-3</sup></b>         | 0.77/-0.89                                                    | 1.20/-0.72                                                    |

Table S4: Bond lengths for 1\*\*.

| Atom | Atom            | Length/Å   |
|------|-----------------|------------|
| Sb1  | F1              | 1.852(2)   |
| Sb1  | F2 <sup>1</sup> | 1.8640(16) |
| Sb1  | F2              | 1.8640(16) |
| Sb1  | F3              | 1.8735(16) |
| Sb1  | F4              | 1.8736(15) |
| Sb1  | F5              | 1.852(2)   |
| S1   | C3              | 1.725(3)   |
| S1   | C9              | 1.730(3)   |
| N1   | C4              | 1.364(3)   |
| N1   | C5              | 1.364(3)   |
| C1   | C2              | 1.373(4)   |
| C1   | C11             | 1.403(4)   |
| C2   | C3              | 1.403(4)   |
| C3   | C4              | 1.411(3)   |
| C4   | C12             | 1.418(4)   |
| C5   | C6              | 1.419(4)   |
| C5   | C9              | 1.413(3)   |
| C6   | C7              | 1.359(4)   |
| C7   | C8              | 1.406(5)   |
| C8   | C10             | 1.375(4)   |
| C9   | C10             | 1.394(4)   |
| C11  | C12             | 1.363(4)   |

<sup>1</sup>+X,3/2-Y,+Z

Table S5: Bond angles for 1\*\*.

| Atom            | Atom | Atom            | Angle/°    | Atom | Atom | Atom | Angle/°    |
|-----------------|------|-----------------|------------|------|------|------|------------|
| F1              | Sb1  | F2              | 89.18(7)   | C2   | C3   | S1   | 117.65(19) |
| F1              | Sb1  | F2 <sup>1</sup> | 89.18(7)   | C2   | C3   | C4   | 119.5(2)   |
| F1              | Sb1  | F3              | 88.90(9)   | C4   | C3   | S1   | 122.9(2)   |
| F1              | Sb1  | F4              | 89.75(9)   | N1   | C4   | C3   | 121.7(2)   |
| F2              | Sb1  | F2 <sup>1</sup> | 178.34(13) | N1   | C4   | C12  | 118.8(2)   |
| F2              | Sb1  | F3              | 89.84(5)   | C3   | C4   | C12  | 119.5(2)   |
| F2 <sup>1</sup> | Sb1  | F3              | 89.84(5)   | N1   | C5   | C6   | 118.4(2)   |
| F2              | Sb1  | F4              | 90.14(5)   | N1   | C5   | C9   | 122.0(2)   |
| F2 <sup>1</sup> | Sb1  | F4              | 90.14(5)   | C9   | C5   | C6   | 119.5(2)   |
| F3              | Sb1  | F4              | 178.65(8)  | C7   | C6   | C5   | 119.4(3)   |

|    |     |                 |            |     |     |    |          |
|----|-----|-----------------|------------|-----|-----|----|----------|
| F5 | Sb1 | F1              | 179.86(9)  | C6  | C7  | C8 | 120.9(3) |
| F5 | Sb1 | F2              | 90.82(7)   | C10 | C8  | C7 | 120.6(3) |
| F5 | Sb1 | F2 <sup>1</sup> | 90.82(7)   | C5  | C9  | S1 | 122.4(2) |
| F5 | Sb1 | F3              | 90.96(9)   | C10 | C9  | S1 | 117.9(2) |
| F5 | Sb1 | F4              | 90.39(9)   | C10 | C9  | C5 | 119.8(2) |
| C3 | S1  | C9              | 103.69(12) | C8  | C10 | C9 | 119.8(3) |
| C4 | N1  | C5              | 127.3(2)   | C12 | C11 | C1 | 121.3(3) |
| C2 | C1  | C11             | 120.1(3)   | C11 | C12 | C4 | 119.5(3) |
| C1 | C2  | C3              | 120.3(3)   |     |     |    |          |

Table S6: Bond lengths for 2<sup>+</sup>.

| Atom | Atom | Length/Å   |
|------|------|------------|
| Sb1  | F1   | 1.8681(12) |
| Sb1  | F2   | 1.8664(12) |
| Sb1  | F3   | 1.8619(10) |
| Sb1  | F4   | 1.8886(11) |
| Sb1  | F5   | 1.8799(10) |
| Sb1  | F6   | 1.8706(12) |
| S1   | C3   | 1.7257(15) |
| S1   | C10  | 1.7209(17) |
| C3   | C4   | 1.413(2)   |
| C3   | C5   | 1.401(2)   |
| C4   | C6   | 1.412(2)   |
| C4   | N    | 1.380(2)   |
| C10  | C7   | 1.409(2)   |
| C10  | C11  | 1.406(2)   |
| C7   | C12  | 1.411(2)   |
| C7   | N    | 1.370(2)   |
| C6   | C8   | 1.372(3)   |
| C5   | C9   | 1.374(3)   |
| C12  | C13  | 1.373(3)   |
| C11  | C14  | 1.376(3)   |
| C8   | C9   | 1.404(3)   |
| C14  | C13  | 1.397(3)   |

Table S7: Bond angles for 2<sup>+</sup>.

| Atom | Atom | Atom | Angle/°   | Atom | Atom | Atom | Angle/°    |
|------|------|------|-----------|------|------|------|------------|
| F1   | Sb1  | F4   | 178.54(5) | C6   | C4   | C3   | 119.48(15) |
| F1   | Sb1  | F5   | 90.20(6)  | N    | C4   | C3   | 121.93(13) |
| F1   | Sb1  | F6   | 91.33(6)  | N    | C4   | C6   | 118.58(14) |
| F2   | Sb1  | F1   | 89.67(7)  | C7   | C10  | S1   | 123.32(12) |
| F2   | Sb1  | F4   | 90.56(6)  | C11  | C10  | S1   | 117.52(13) |
| F2   | Sb1  | F5   | 90.46(6)  | C11  | C10  | C7   | 119.16(16) |

|     |     |    |            |     |     |     |            |
|-----|-----|----|------------|-----|-----|-----|------------|
| F2  | Sb1 | F6 | 178.50(6)  | C10 | C7  | C12 | 119.83(15) |
| F3  | Sb1 | F1 | 91.62(6)   | N   | C7  | C10 | 121.85(15) |
| F3  | Sb1 | F2 | 90.17(6)   | N   | C7  | C12 | 118.31(14) |
| F3  | Sb1 | F4 | 89.82(5)   | C8  | C6  | C4  | 119.88(15) |
| F3  | Sb1 | F5 | 178.07(5)  | C9  | C5  | C3  | 120.25(16) |
| F3  | Sb1 | F6 | 90.91(6)   | C13 | C12 | C7  | 119.55(17) |
| F5  | Sb1 | F4 | 88.35(5)   | C14 | C11 | C10 | 120.28(17) |
| F6  | Sb1 | F4 | 88.40(6)   | C6  | C8  | C9  | 120.52(16) |
| F6  | Sb1 | F5 | 88.42(6)   | C5  | C9  | C8  | 120.41(17) |
| C10 | S1  | C3 | 103.35(7)  | C11 | C14 | C13 | 120.23(17) |
| C4  | C3  | S1 | 122.75(12) | C12 | C13 | C14 | 120.95(18) |
| C5  | C3  | S1 | 117.81(12) | C7  | N   | C4  | 126.07(13) |
| C5  | C3  | C4 | 119.43(14) |     |     |     |            |

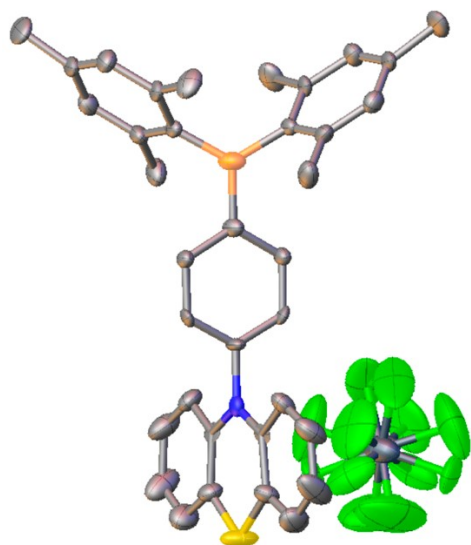

**Figure S24:** Solid state structure of **3<sup>+</sup>**. Thermal ellipsoids are drawn at 50% probability and hydrogen atoms are omitted for clarity. N: Blue, S: Yellow, F: Green, Sb: Dark Grey, C: Light Grey, B: Orange.

**Table S8:** Crystal data and structure refinement for **3<sup>+</sup>**.

|                                       |                                                                         |
|---------------------------------------|-------------------------------------------------------------------------|
| <b>Molecule</b>                       | <b>3<sup>+</sup></b>                                                    |
| <b>Formula</b>                        | C <sub>36</sub> H <sub>34</sub> BF <sub>7.07</sub> NSSb <sub>1.12</sub> |
| <b>CCDC ID</b>                        | 2335095                                                                 |
| <b>Formula wt (gmol<sup>-1</sup>)</b> | 793.85                                                                  |
| <b>Temperature (K)</b>                | 173.0                                                                   |
| <b>Crystal System</b>                 | Orthorhombic                                                            |
| <b>Space Group</b>                    | Pccn                                                                    |
| <b>a/Å</b>                            | 8.8901(3)                                                               |
| <b>b/Å</b>                            | 16.4785(6)                                                              |
| <b>c/Å</b>                            | 27.2684(9)                                                              |
| <b>α/°</b>                            | 90                                                                      |
| <b>β/°</b>                            | 90                                                                      |

|                                                |                                                               |
|------------------------------------------------|---------------------------------------------------------------|
| $\gamma/^\circ$                                | 90                                                            |
| Volume/ $\text{\AA}^3$                         | 3994.7(2)                                                     |
| Z                                              | 4                                                             |
| $\rho_{\text{calc}}/\text{g/cm}^3$             | 1.320                                                         |
| $\mu/\text{mm}^{-1}$                           | 0.877                                                         |
| F(000)                                         | 1594.0                                                        |
| Crystal size/ $\text{mm}^3$                    | $0.2 \times 0.075 \times 0.075$                               |
| Radiation                                      | MoK $\alpha$ ( $\lambda = 0.71073$ )                          |
| 2 $\theta$ range for data collection/ $^\circ$ | 3.878 to 53.074                                               |
| Index ranges                                   | $-11 \leq h \leq 11, -20 \leq k \leq 20, -34 \leq l \leq 34$  |
| Reflections collected                          | 92047                                                         |
| Independent reflections                        | 4156 [ $R_{\text{int}} = 0.0481, R_{\text{sigma}} = 0.0168$ ] |
| Data/restraints/parameters                     | 4156/0/286                                                    |
| Goodness-of-fit on $F^2$                       | 1.134                                                         |
| Final R indexes [ $I \geq 2\sigma(I)$ ]        | $R1 = 0.0968, wR2 = 0.2120$                                   |
| Final R indexes [all data]                     | $R1 = 0.1024, wR2 = 0.2151$                                   |
| Largest diff. peak/hole / $e \text{\AA}^{-3}$  | 0.84/-0.77                                                    |

Table S9: Bond lengths for 3<sup>+</sup>.

| Atom | Atom  | Length/ $\text{\AA}$ |
|------|-------|----------------------|
| Sb01 | F1    | 1.868(12)            |
| Sb01 | F11   | 1.868(12)            |
| Sb01 | F3    | 1.812(14)            |
| Sb01 | F31   | 1.812(14)            |
| Sb01 | F4    | 1.815(14)            |
| Sb01 | F41   | 1.815(13)            |
| S    | C00L  | 1.726(8)             |
| S    | C00L2 | 1.726(8)             |
| C005 | N006  | 1.393(8)             |
| C005 | C00C  | 1.400(11)            |
| C005 | C00L  | 1.422(9)             |
| N006 | C00H  | 1.457(11)            |
| C007 | C009  | 1.400(11)            |
| C007 | C00I  | 1.370(12)            |
| C007 | C00J  | 1.480(10)            |
| C008 | C00O  | 1.418(8)             |
| C008 | C00O2 | 1.418(8)             |
| C008 | B00P  | 1.574(14)            |
| C009 | C00E  | 1.402(10)            |
| C00A | C00E  | 1.408(11)            |
| C00A | C00F  | 1.410(10)            |
| C00A | B00P  | 1.586(8)             |
| C00B | C00H  | 1.373(8)             |
| C00B | C00O  | 1.393(9)             |
| C00C | C00D  | 1.366(14)            |
| C00D | C00G  | 1.383(16)            |
| C00E | C00M  | 1.553(11)            |



|      |      |           |
|------|------|-----------|
| C00F | C00I | 1.392(10) |
| C00F | C00N | 1.498(12) |
| C00G | C00K | 1.341(15) |
| C00K | C00L | 1.387(12) |
| Sb1  | Sb11 | 0.43(9)   |
| Sb1  | F2   | 1.77(5)   |
| Sb1  | F21  | 1.85(5)   |
| Sb1  | F7   | 1.73(3)   |
| Sb1  | F71  | 1.92(3)   |
| Sb1  | F9   | 1.62(4)   |
| Sb1  | F91  | 2.00(5)   |
| F7   | F71  | 1.77(7)   |

Table S10: Bond angles for 3<sup>+</sup>.

| Atom  | Atom | Atom  | Angle/°   | Atom  | Atom | Atom  | Angle/°   |
|-------|------|-------|-----------|-------|------|-------|-----------|
| F1    | Sb01 | F11   | 148(2)    | C00D  | C00C | C005  | 119.8(8)  |
| F3    | Sb01 | F1    | 91.5(10)  | C00C  | C00D | C00G  | 121.7(10) |
| F3    | Sb01 | F11   | 79.5(8)   | C009  | C00E | C00A  | 120.5(7)  |
| F31   | Sb01 | F1    | 79.5(8)   | C009  | C00E | C00M  | 117.5(7)  |
| F31   | Sb01 | F11   | 91.5(10)  | C00A  | C00E | C00M  | 121.9(7)  |
| F31   | Sb01 | F3    | 148(2)    | C00A  | C00F | C00N  | 122.4(6)  |
| F3    | Sb01 | F41   | 117.3(12) | C00I  | C00F | C00A  | 118.7(7)  |
| F3    | Sb01 | F4    | 90.7(12)  | C00I  | C00F | C00N  | 118.9(7)  |
| F31   | Sb01 | F4    | 117.3(12) | C00K  | C00G | C00D  | 120.0(10) |
| F31   | Sb01 | F41   | 90.7(12)  | C00B  | C00H | N006  | 118.8(4)  |
| F41   | Sb01 | F11   | 78.4(13)  | C00B2 | C00H | N006  | 118.8(4)  |
| F41   | Sb01 | F1    | 132.1(13) | C00B  | C00H | C00B2 | 122.5(9)  |
| F4    | Sb01 | F1    | 78.4(13)  | C007  | C00I | C00F  | 124.2(8)  |
| F4    | Sb01 | F11   | 132.1(13) | C00G  | C00K | C00L  | 120.5(9)  |
| F41   | Sb01 | F4    | 64.9(13)  | C005  | C00L | S     | 123.7(6)  |
| C00L2 | S    | C00L  | 103.2(5)  | C00K  | C00L | S     | 115.9(6)  |
| N006  | C005 | C00C  | 120.4(6)  | C00K  | C00L | C005  | 120.4(8)  |
| N006  | C005 | C00L  | 122.1(7)  | C00B  | C00O | C008  | 119.4(6)  |
| C00C  | C005 | C00L  | 117.4(7)  | C008  | B00P | C00A2 | 119.9(4)  |
| C005  | N006 | C0052 | 125.1(8)  | C008  | B00P | C00A  | 119.9(4)  |
| C005  | N006 | C00H  | 117.4(4)  | C00A2 | B00P | C00A  | 120.2(8)  |
| C0052 | N006 | C00H  | 117.4(4)  | Sb11  | Sb1  | F2    | 95(10)    |
| C009  | C007 | C00J  | 120.9(8)  | Sb11  | Sb1  | F7    | 110(3)    |
| C00I  | C007 | C009  | 117.1(7)  | Sb11  | Sb1  | F91   | 26(9)     |
| C00I  | C007 | C00J  | 121.8(8)  | Sb11  | Sb1  | F9    | 148(10)   |
| C00O  | C008 | C00O2 | 119.4(8)  | F2    | Sb1  | F91   | 71.0(17)  |
| C00O  | C008 | B00P  | 120.3(4)  | F21   | Sb1  | F91   | 85(2)     |

|       |      |      |          |     |     |     |        |
|-------|------|------|----------|-----|-----|-----|--------|
| C00O2 | C008 | B00P | 120.3(4) | F7  | Sb1 | F2  | 95(3)  |
| C007  | C009 | C00E | 121.2(7) | F7  | Sb1 | F91 | 120(2) |
| C00E  | C00A | C00F | 118.5(6) | F71 | Sb1 | F91 | 80(2)  |
| C00E  | C00A | B00P | 120.2(6) | F9  | Sb1 | F2  | 100(3) |
| C00F  | C00A | B00P | 121.2(6) | F9  | Sb1 | F7  | 97(3)  |
| C00H  | C00B | C00O | 119.6(7) | F9  | Sb1 | F91 | 142(2) |

## S10 References

- (1) Bentley, J. N.; Pradhan, E.; Zeng, T.; Caputo, C. B. *Dalton Trans.* **2020**, 49 (45), 16054–16058.
- (2) Neena, K. K.; Sudhakar, P.; Dipak, K.; Thilagar, P. *Chem. Commun.* **2017**, 53 (26), 3641–3644.
- (3) Na, Y.-J.; Song, W.; Lee, J. Y.; Hwang, S.-H. *Dalton Trans.* **2015**, 44 (18), 8360–8363.
- (4) Liu, F.; Tan, Y.; Liu, H.; Tang, X.; Gao, L.; Du, C.; Min, J.; Jin, H.; Lu, P. *J. Mater. Chem. C* **2020**, 8 (20), 6883–6890.
- (5) Dolomanov, O. V.; Bourhis, L. J.; Gildea, R. J.; Howard, J. A. K.; Puschmann, H. *J. Appl. Crystallogr.* **2009**, 42 (2), 339–341.
- (6) Sheldrick, G. M. *Acta Crystallogr. A* **2008**, 64 (1), 112–122.
- (7) Mayer, U.; Gutmann, V.; Gerger, W. *Monatshefte Für Chem.* **1975**, 106 (6), 1235–1257.
- (8) Gutmann, V. *Coord. Chem. Rev.* **1976**, 18 (2), 225–255.
- (9) Gaussian 16, Revision C.01, M. J. Frisch, G. W. Trucks, H. B. Schlegel, G. E. Scuseria, M. A. Robb, J. R. Cheeseman, G. Scalmani, V. Barone, G. A. Petersson, H. Nakatsuji, X. Li, M. Caricato, A. V. Marenich, J. Bloino, B. G. Janesko, R. Gomperts, B. Mennucci, H. P. Hratchian, J. V. Ortiz, A. F. Izmaylov, J. L. Sonnenberg, D. Williams-Young, F. Ding, F. Lipparini, F. Egidi, J. Goings, B. Peng, A. Petrone, T. Henderson, D. Ranasinghe, V. G. Zakrzewski, J. Gao, N. Rega, G. Zheng, W. Liang, M. Hada, M. Ehara, K. Toyota, R. Fukuda, J. Hasegawa, M. Ishida, T. Nakajima, Y. Honda, O. Kitao, H. Nakai, T. Vreven, K. Throssell, J. A. Montgomery, Jr., J. E. Peralta, F. Ogliaro, M. J. Bearpark, J. J. Heyd, E. N. Brothers, K. N. Kudin, V. N. Staroverov, T. A. Keith, R. Kobayashi, J. Normand, K. Raghavachari, A. P. Rendell, J. C. Burant, S. S. Iyengar, J. Tomasi, M. Cossi, J. M. Millam, M. Klene, C. Adamo, R. Cammi, J. W. Ochterski, R. L. Martin, K. Morokuma, O. Farkas, J. B. Foresman, and D. J. Fox, Gaussian, Inc., Wallingford CT, 2016.
- (10) Lee, C.; Yang, W.; Parr, R. G. *Phys. Rev. B* **1988**, 37 (2), 785–789.
- (11) Becke, A. D. *J. Chem. Phys.* **1993**, 98 (7), 5648–5652.
- (12) Ditchfield, R.; Hehre, W. J.; Pople, J. A. *J. Chem. Phys.* **1971**, 54 (2), 724–728.
- (13) Hehre, W. J.; Ditchfield, R.; Pople, J. A. *J. Chem. Phys.* **1972**, 56 (5), 2257–2261.
- (14) Hariharan, P. C.; Pople, J. A. *Theor. Chim. Acta* **1973**, 28 (3), 213–222.
- (15) Foresman, J. B.; Keith, T. A.; Wiberg, K. B.; Snoonian, J.; Frisch, M. J. *J. Phys. Chem.* **1996**, 100 (40), 16098–16104.
- (16) Erdmann, P.; Leitner, J.; Schwarz, J.; Greb, L. *ChemPhysChem* **2020**, 21 (10), 987–994.
- (17) Blokker, E.; Groen, C. G. T.; Van Der Schuur, J. M.; Talma, A. G.; Bickelhaupt, F. M. *Results Chem.* **2019**, 1, 100007.
- (18) Tanaka, H.; Nakamoto, M.; Yoshida, H. *RSC Adv.* **2023**, 13 (4), 2451–2457.
- (19) Erdmann, P.; Greb, L. *ChemPhysChem* **2021**, 22 (10), 935–943.
